# Supplementary material for: Characterization of a Basidiomycota hydrophobin reveals the structural basis for a high-similarity Class I subdivision
Source: PubMed Central journal article supplement (PMC5385502; doi:10.1038/srep45863), 2017-04-10
Supplement: srep45863-s1.pdf [file srep45863-s1.pdf]

# **Characterization of a Basidiomycota hydrophobin reveals the structural basis for a high-similarity Class I subdivision**

Julie-Anne Gandier<sup>1,\*</sup>, David N. Langelaan<sup>2,\*</sup>, Amy Won<sup>3</sup>, Kylie O'Donnell<sup>1</sup>, Julie L. Grondin<sup>4</sup>, Holly L. Spencer<sup>4</sup>, Philip Wong<sup>5</sup>, Elisabeth Tillier<sup>5</sup>, Christopher Yip<sup>3</sup>, Steven P. Smith<sup>4</sup>, Emma R. Master<sup>1,\*</sup>

<sup>1</sup>Department of Chemical Engineering and Applied Chemistry, University of Toronto, Toronto, Ontario, Canada

<sup>2</sup>Department of Biochemistry & Molecular Biology, Dalhousie University, Halifax, Nova Scotia, Canada

<sup>3</sup>Department of Medical Biophysics, University of Toronto, Toronto, Ontario, Canada

<sup>4</sup>Department of Biomedical and Molecular Sciences, Queen's University, Kingston, Ontario, Canada

<sup>5</sup>e-Institute of Biomaterials and Biomedical Engineering, University of Toronto, Toronto, Ontario, Canada

\*These authors contributed equally to the work.

Correspondence and request for materials should be addressed to E.R.M. (email: emma.master@utoronto.ca)

## **Supplementary Materials**

**Supplementary Table 1:** Structural statistics of the SC16 structural ensemble<sup>a</sup>

| <b>Completeness of Resonance Assignments (%)<sup>b</sup></b> |                             |
|--------------------------------------------------------------|-----------------------------|
| Backbone                                                     | 84.1                        |
| Side Chain                                                   | 79.9                        |
| Aromatic                                                     | 100                         |
| <b>Number of conformational restraints</b>                   |                             |
| Total NOE restraints                                         | 1495                        |
| Intraresidue (i=j)                                           | 647                         |
| Sequential ( i-j  = 1)                                       | 336                         |
| Medium range ( i-j  < 5)                                     | 167                         |
| Long range ( i-j  ≥ 5)                                       | 345                         |
| Ambiguous                                                    | 51                          |
| Dihedral angle restraints                                    | 132                         |
| Hydrogen bond restraints                                     | 50                          |
| NOE Restraints per residue                                   | 14.0                        |
| Long range restraints per residue                            | 3.2                         |
| <b>Residual restraint violations<sup>c</sup></b>             |                             |
| RMSD NOE restraints (Å)                                      | 0.03 ± 0.001                |
| RMSD dihedral angle restraints (°)                           | 0.34 ± 0.052                |
| Average no. of distance violations per structure             | 0                           |
| >0.5 Å                                                       | 0                           |
| >0.3 Å                                                       | 0.1                         |
| Average no. of dihedral angle violations per structure > 5°  | 0.34 ± 0.05                 |
| <b>Model quality<sup>d</sup></b>                             |                             |
| RMSD backbone atoms (Å) <sup>e</sup>                         | 0.5                         |
| RMSD heavy atoms (Å) <sup>e</sup>                            | 0.8                         |
| RMSD bond lengths to ideal geometry (Å)                      | 0.005                       |
| RMSD bond angles to ideal geometry (°)                       | 0.8                         |
| <b>MolProbity Ramachandran statistics<sup>c,e</sup></b>      |                             |
| Most favoured regions (%)                                    | 92.2                        |
| Allowed regions (%)                                          | 7.4                         |
| Disallowed regions (%)                                       | 0.4                         |
| <b>Global quality scores (raw/Z score)<sup>c</sup></b>       |                             |
| Verify3D                                                     | 0.38/-1.28                  |
| ProsaII                                                      | 0.60/-0.21                  |
| PROCHECK (Φ-Ψ) <sup>d</sup>                                  | -0.48/-1.57                 |
| PROCHECK (all) <sup>d</sup>                                  | -0.63/-3.73                 |
| MolProbity clash score                                       | 37.12/-4.84                 |
| <b>RPF analysis<sup>f</sup></b>                              |                             |
| Recall                                                       | 0.981                       |
| Precision                                                    | 0.729                       |
| F-measure                                                    | 0.836                       |
| DP score                                                     | 0.886                       |
| <b>Model contents</b>                                        |                             |
| Ordered residue ranges <sup>e</sup>                          | 10-116, 33-35, 37-81,91-115 |
| Total no. of residues                                        | 107                         |
| BMRB accession number                                        | 25976                       |
| PDB ID code                                                  | 2NBH                        |

<sup>a</sup>Structural statistics computed for the ensemble of 20 deposited structures as recommended by the wwPDB task force.

<sup>b</sup>Calculating using the AVS software.

<sup>c</sup> Calculated using CNS version 1.21.

<sup>d</sup> Calculated using the PSVS version 1.5.

<sup>e</sup>Based on ordered residue ranges (S(f) + S(y) > 1.8).

<sup>f</sup>Calculated using CcpNmr Analysis version 2.3.

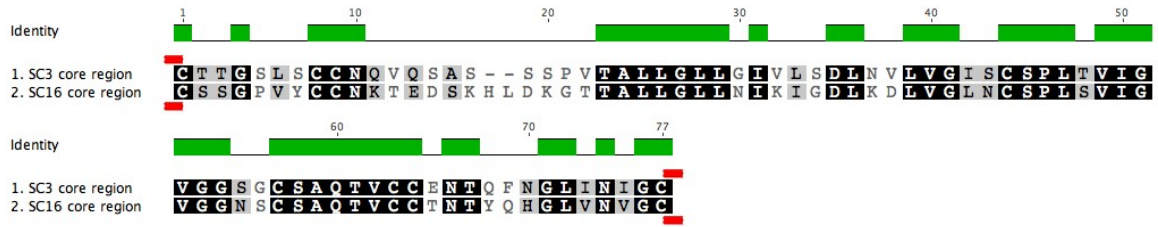

**Supplementary Figure 1. Sequence alignment of the core regions of SC3 and SC16.** The regions spanning from the first to last cysteines of SC3 and SC16 were aligned revealing 56% identity (ClustalW algorithm for pair-wise alignment with the Blosum cost matrix and free end gaps)

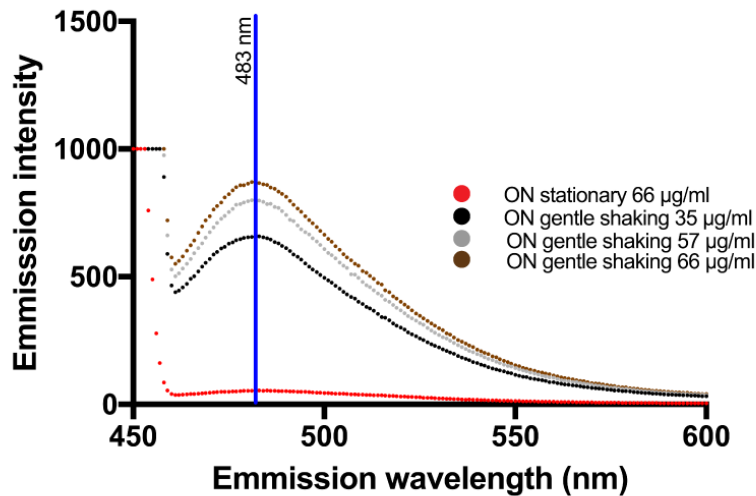

**Supplementary Figure 2. Emission intensity vs. emission wavelength of Thioflavin T (ThT) excited at 442 nm.** The maximum of the emission wavelength remained constant for solutions containing 35-66 µg/ml aerated overnight by gentle tail over head shaking on a rotary shaker. N=1 for each curve.



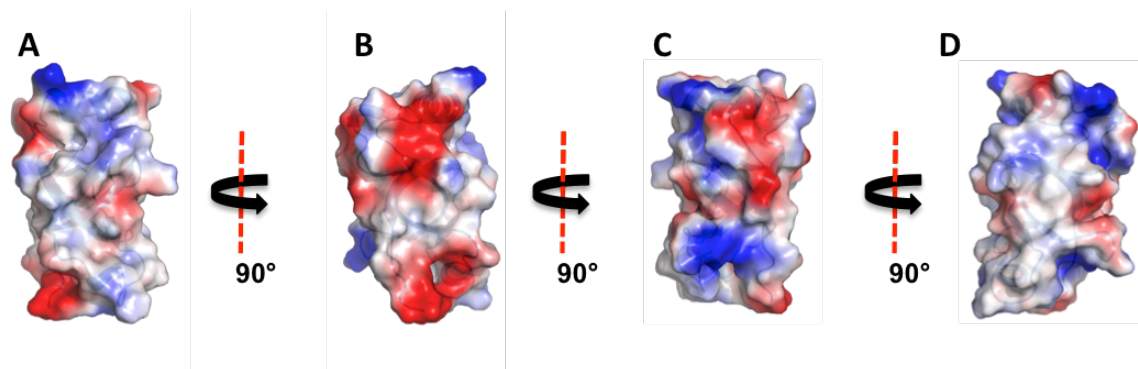

**Supplementary Figure 4.** The electrostatic potential surface of SC16 has several charged patches. Negative and positive electrostatic surface potentials are coloured red and blue, respectively. Although there is a large white non-charged area (**D**), these residues are not hydrophobic in nature.

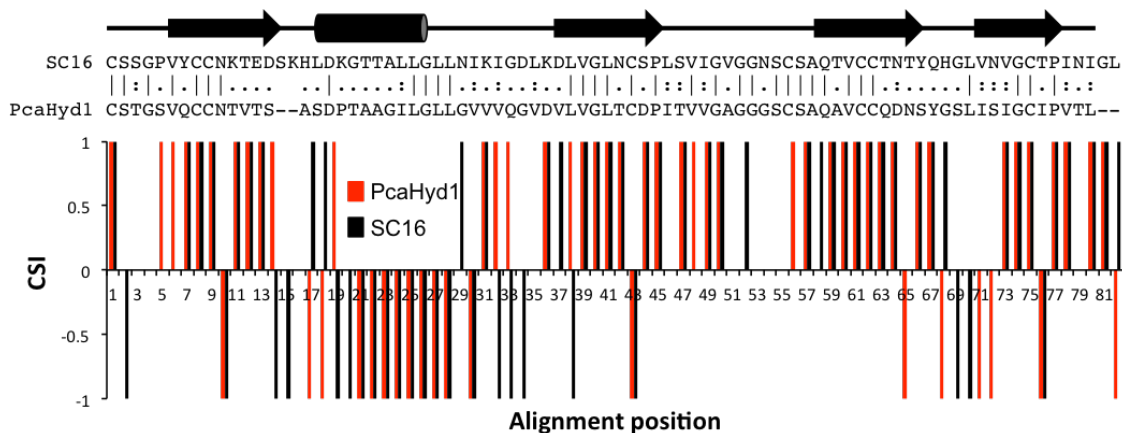

**Supplementary Figure 5.** SC16 and PcaHyd1 share similar secondary structures. The secondary structural elements of SC16 are indicated above the sequence alignment of SC16 and PcaHyd1. The chemical shift index based secondary structure prediction for SC16 (black) and PcaHyd1 (red) are aligned below the sequence alignment. The chemical shift index based prediction of secondary structure for SC16 and PcaHyd1 agree over well conserved regions of SC16 that are structured.

Please note in the following stacks of Supplementary Figures 6A-AB all secretion signals were removed using SignalIP as describes in the methods of the main body of the paper. Tables of identities follow the alignments.

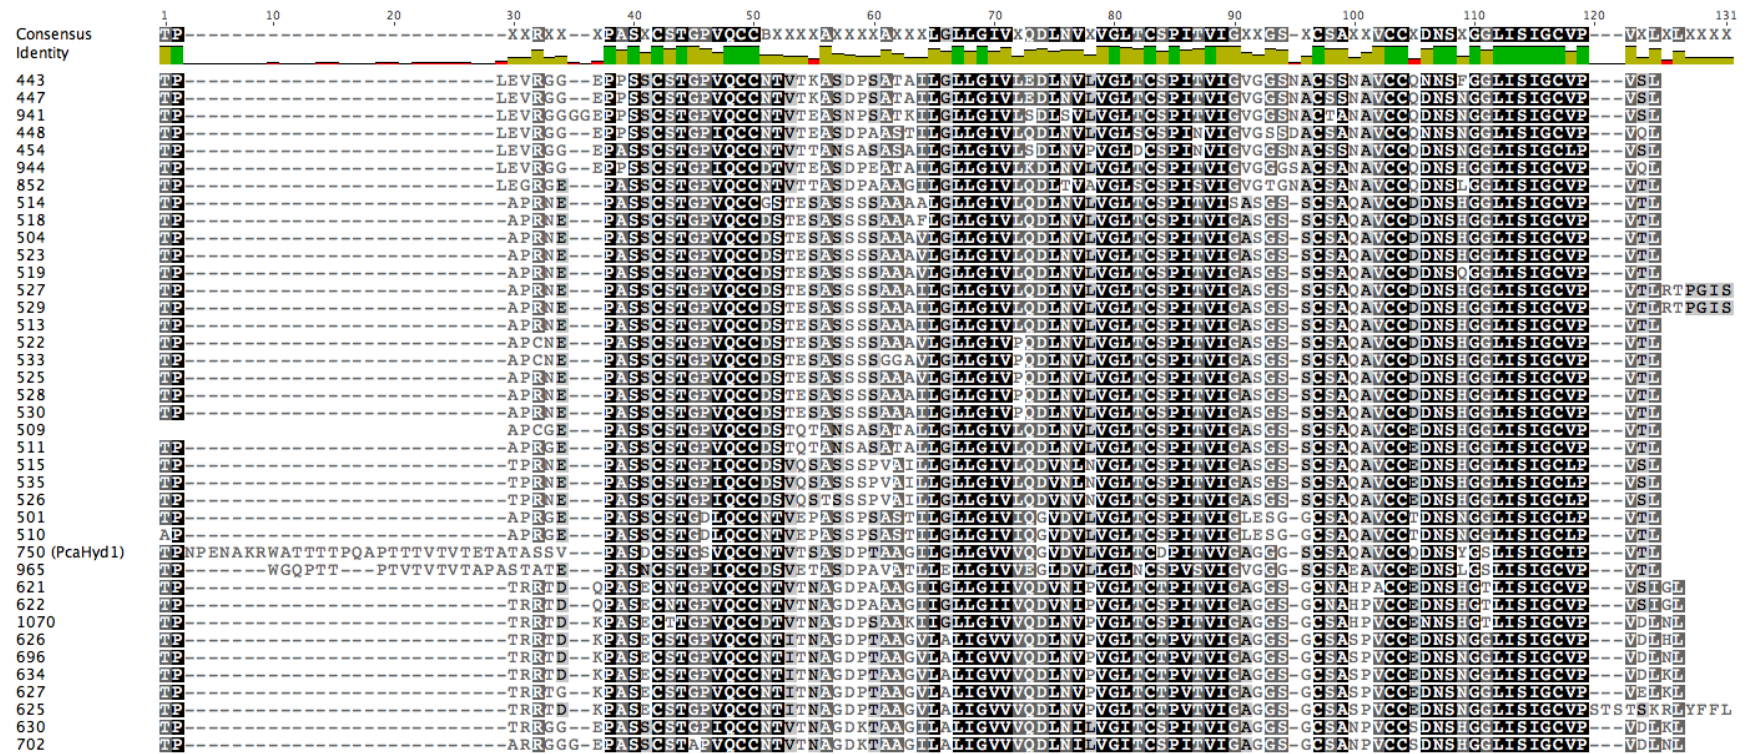

**Supplementary Figure 6A.** Sequence alignment and corresponding consensus sequence of proteins contained in **Region 1** (full sequence)

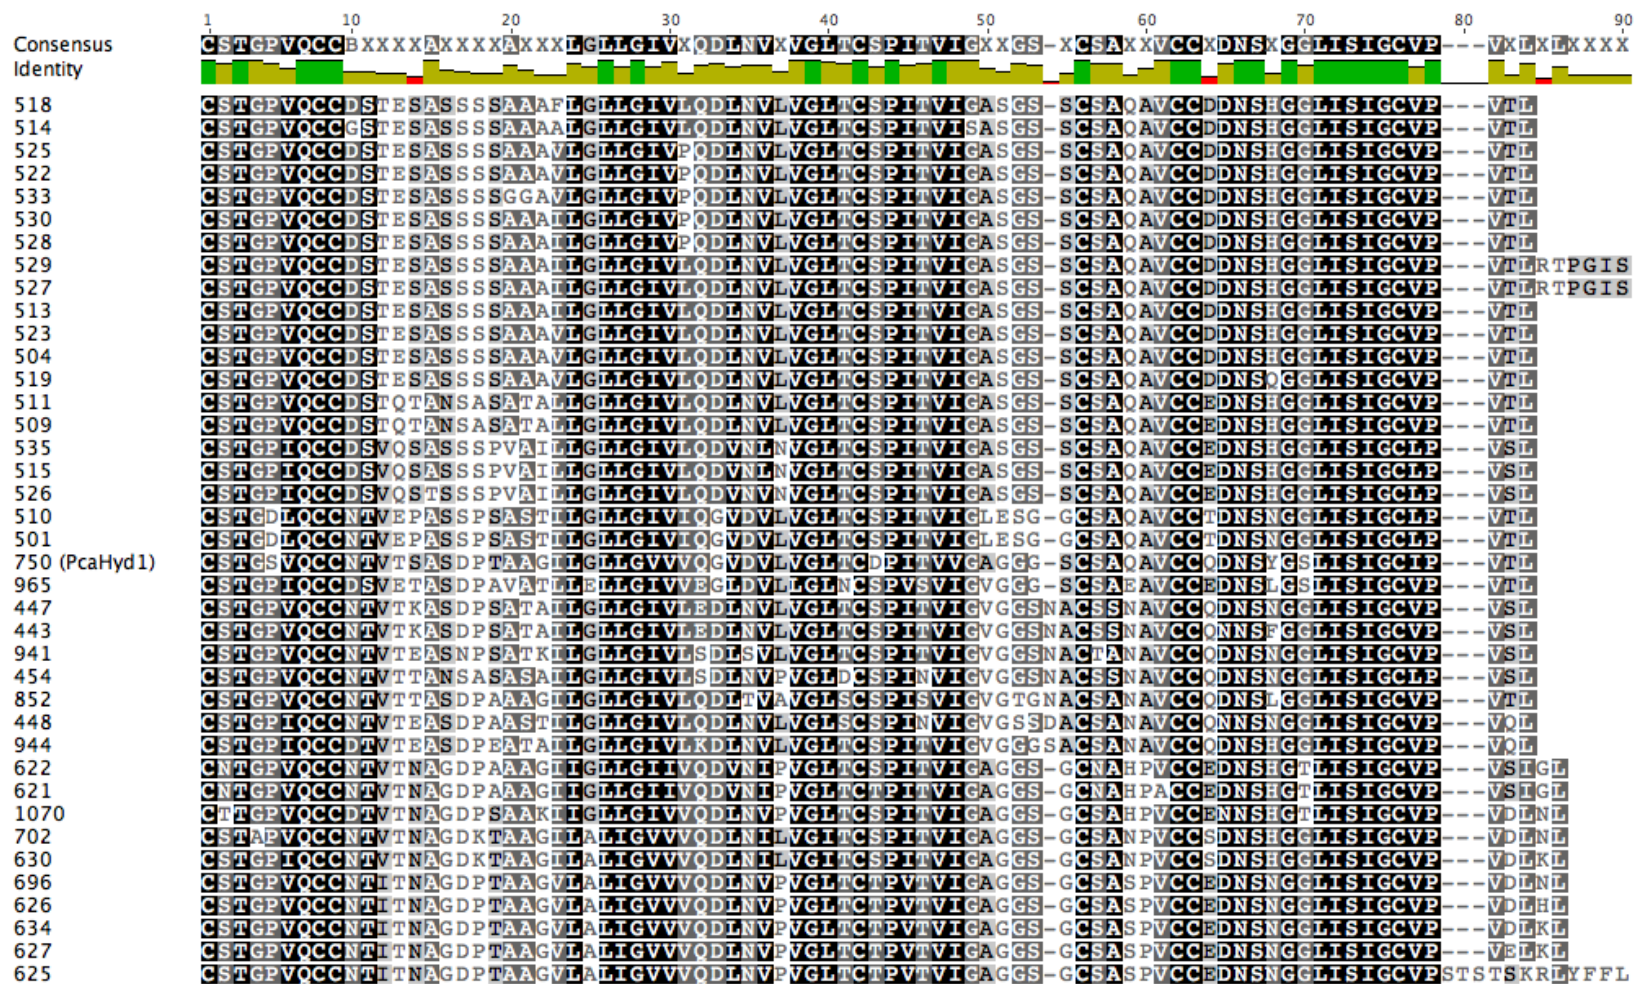

**Supplementary Figure 6B.** Sequence alignment and corresponding consensus sequence of proteins contained in **Region 1** (without N terminus region preceding first cysteine of the eight-cysteine pattern)





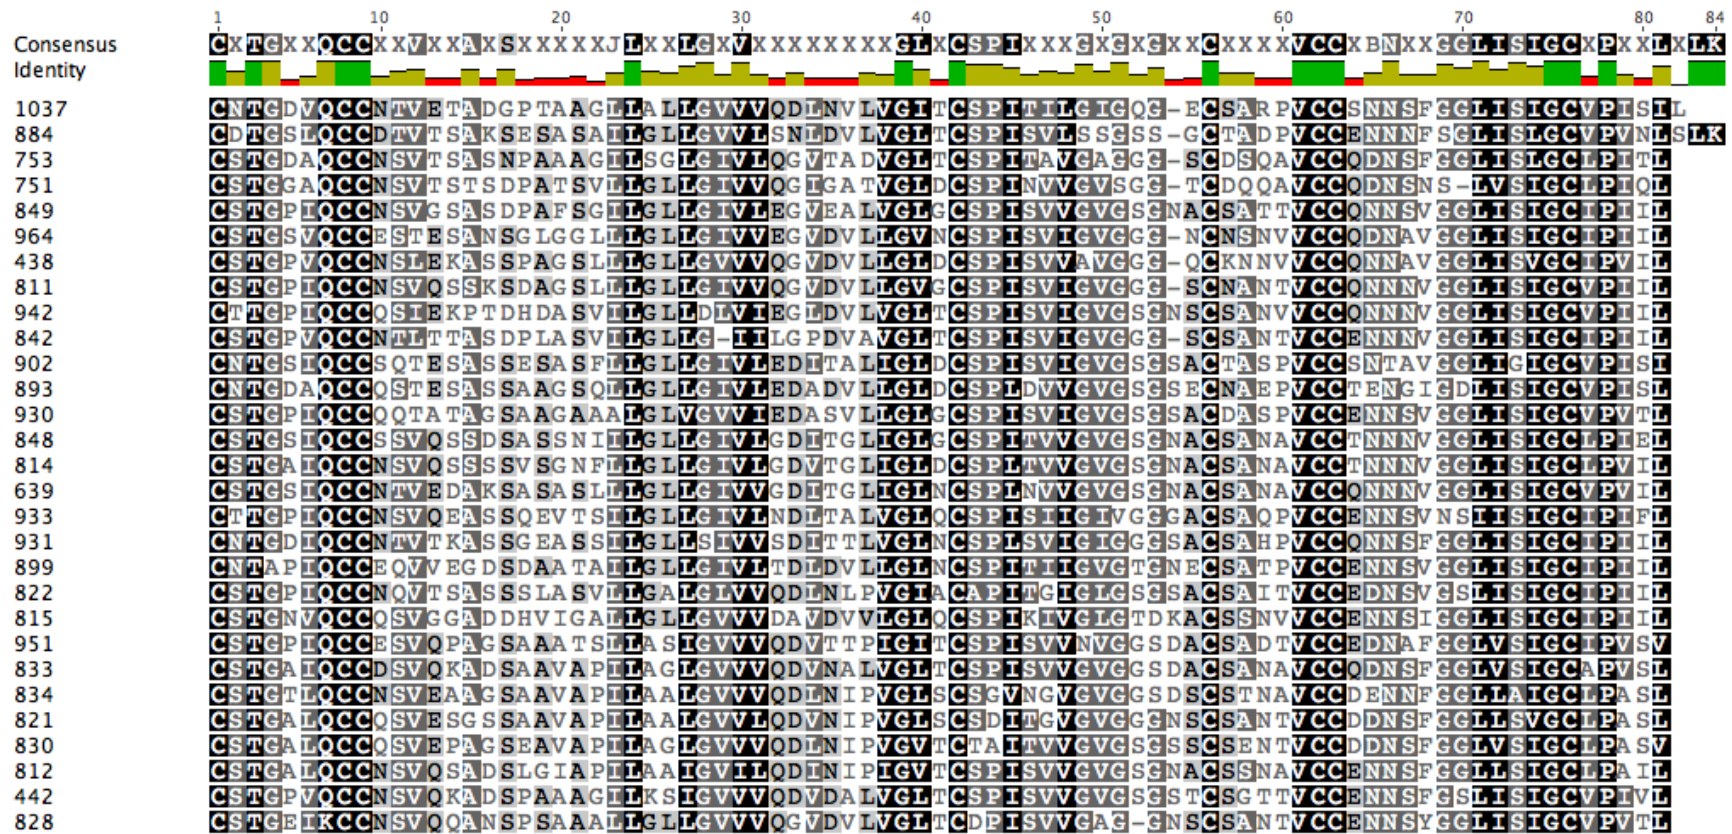

**Supplementary Figure 6D.** Sequence alignment and corresponding consensus sequence of proteins contained in **Region 2** (without N terminus region preceding first cysteine of the eight-cysteine pattern)

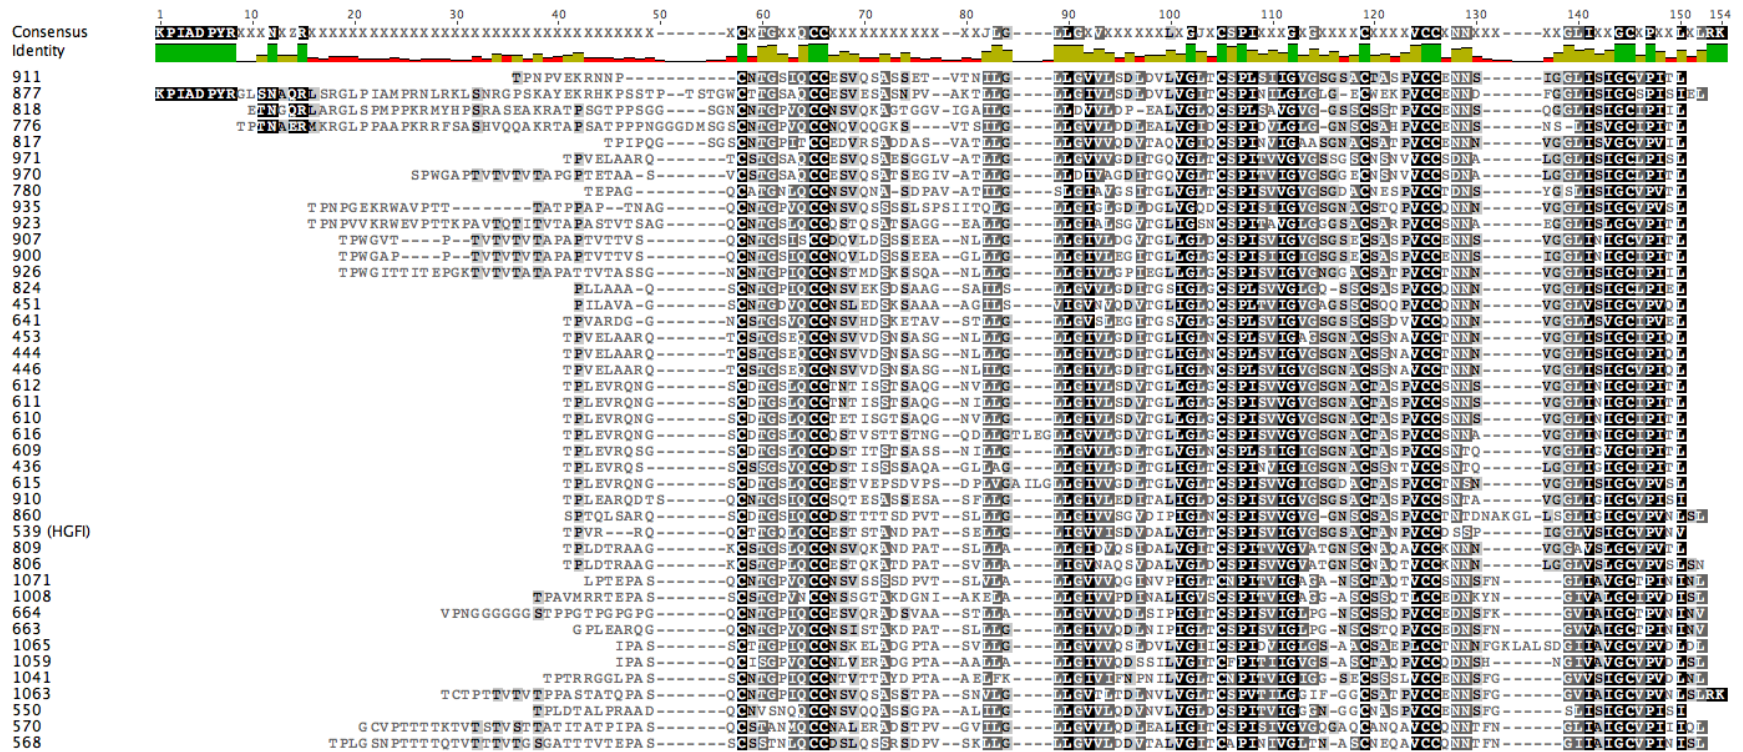

Supplementary Figure 6E. Sequence alignment and corresponding consensus sequence of proteins contained in Region 3 (full sequence)

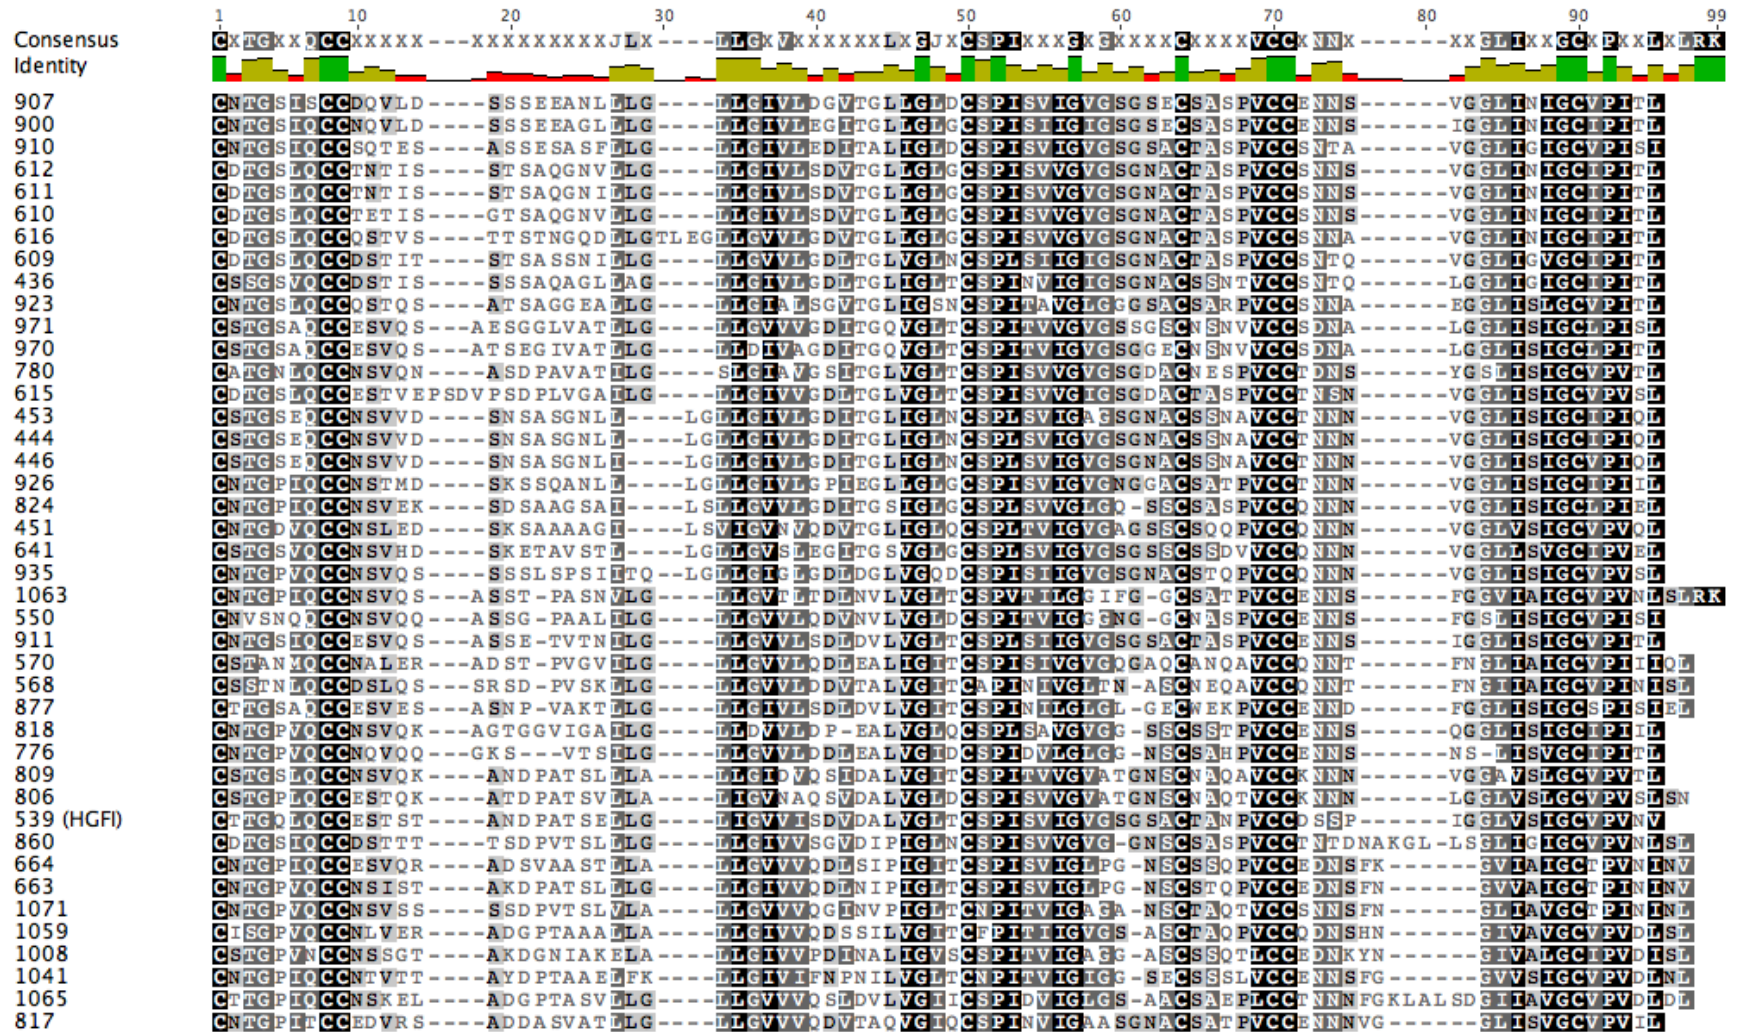

**Supplementary Figure 6F.** Sequence alignment and corresponding consensus sequence of proteins contained in **Region 3** (without N terminus region preceding first cysteine of the eight-cysteine pattern)

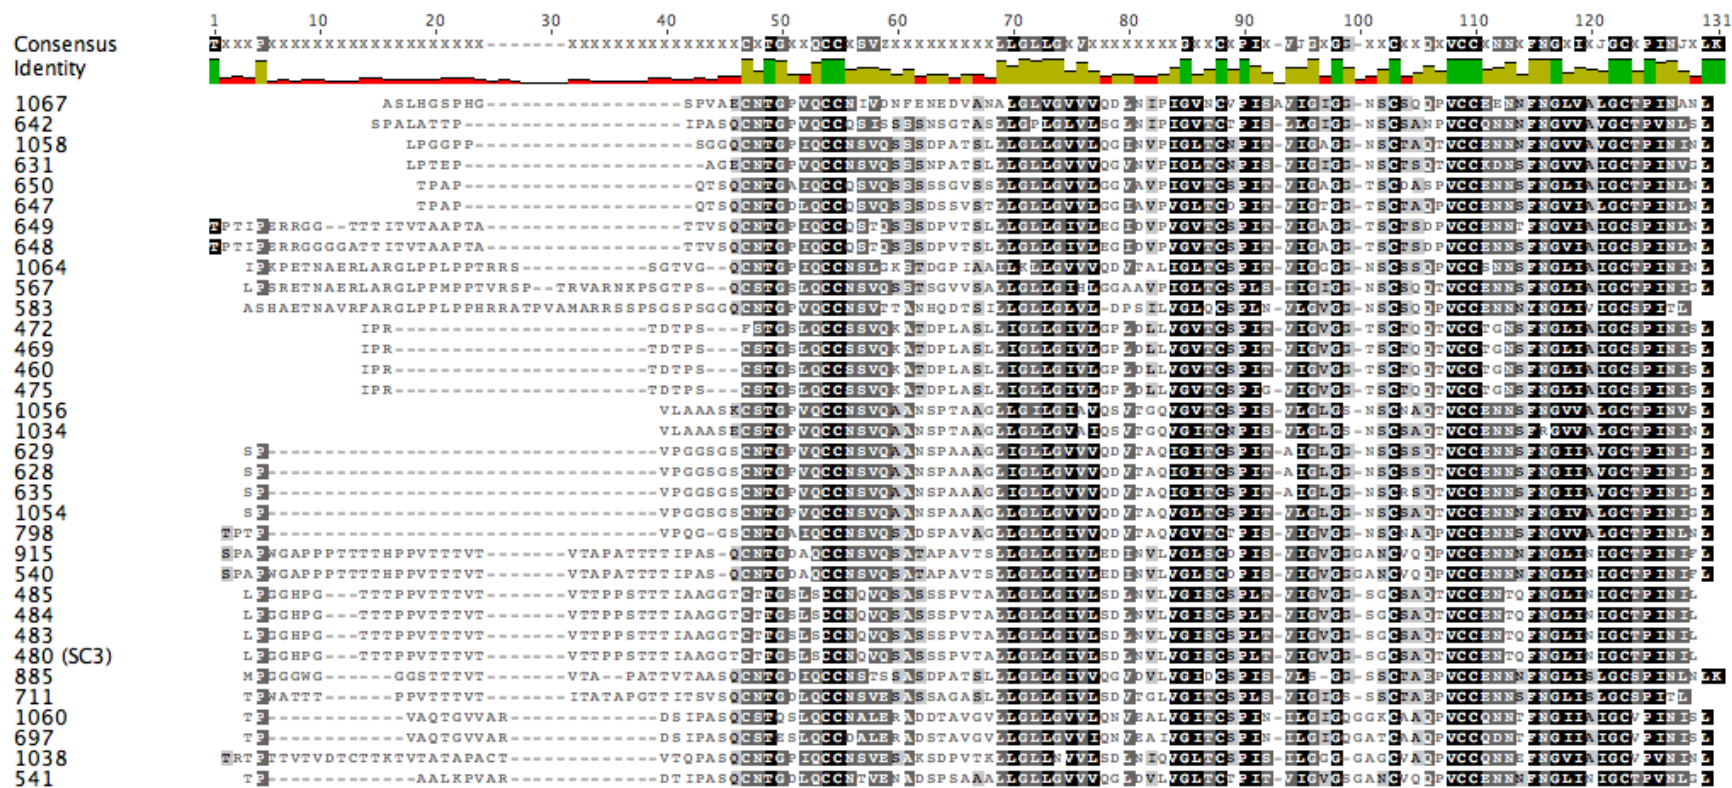

Supplementary Figure 6G. Sequence alignment and corresponding consensus sequence of proteins contained in Region 4 (full sequence)

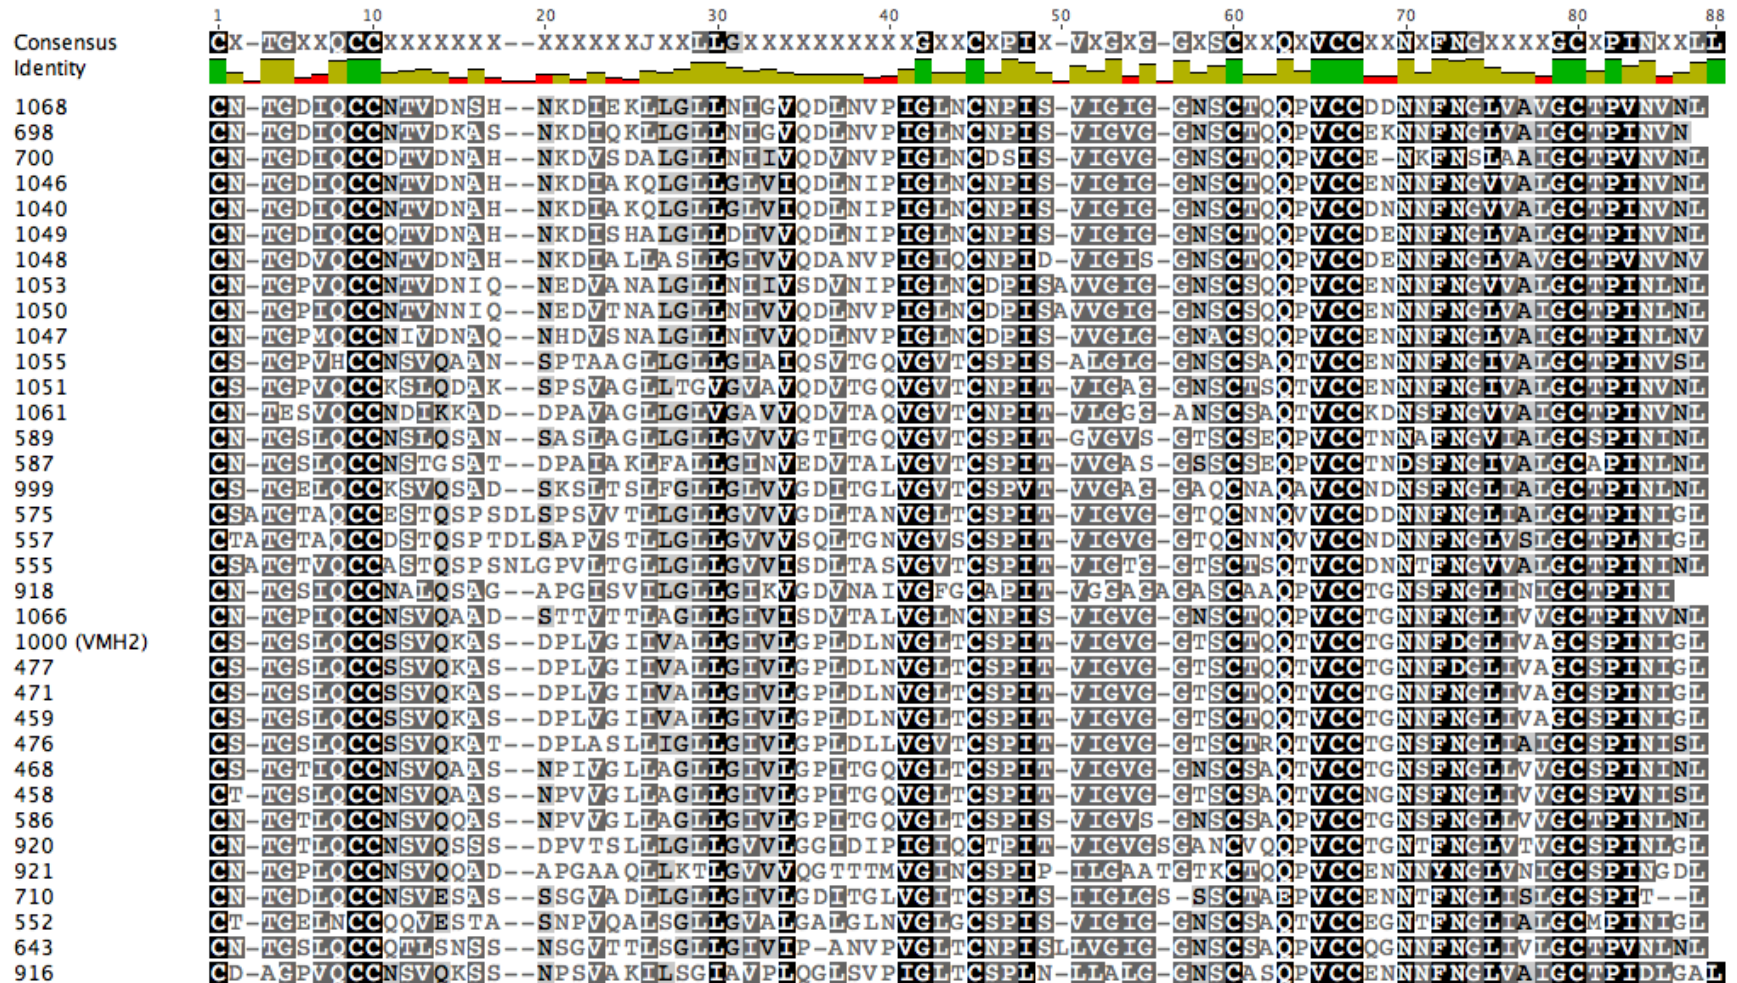

**Supplementary Figure 6H.** Sequence alignment and corresponding consensus sequence of proteins contained in **Region 4** (without N terminus region preceding first cysteine of the eight-cysteine pattern)

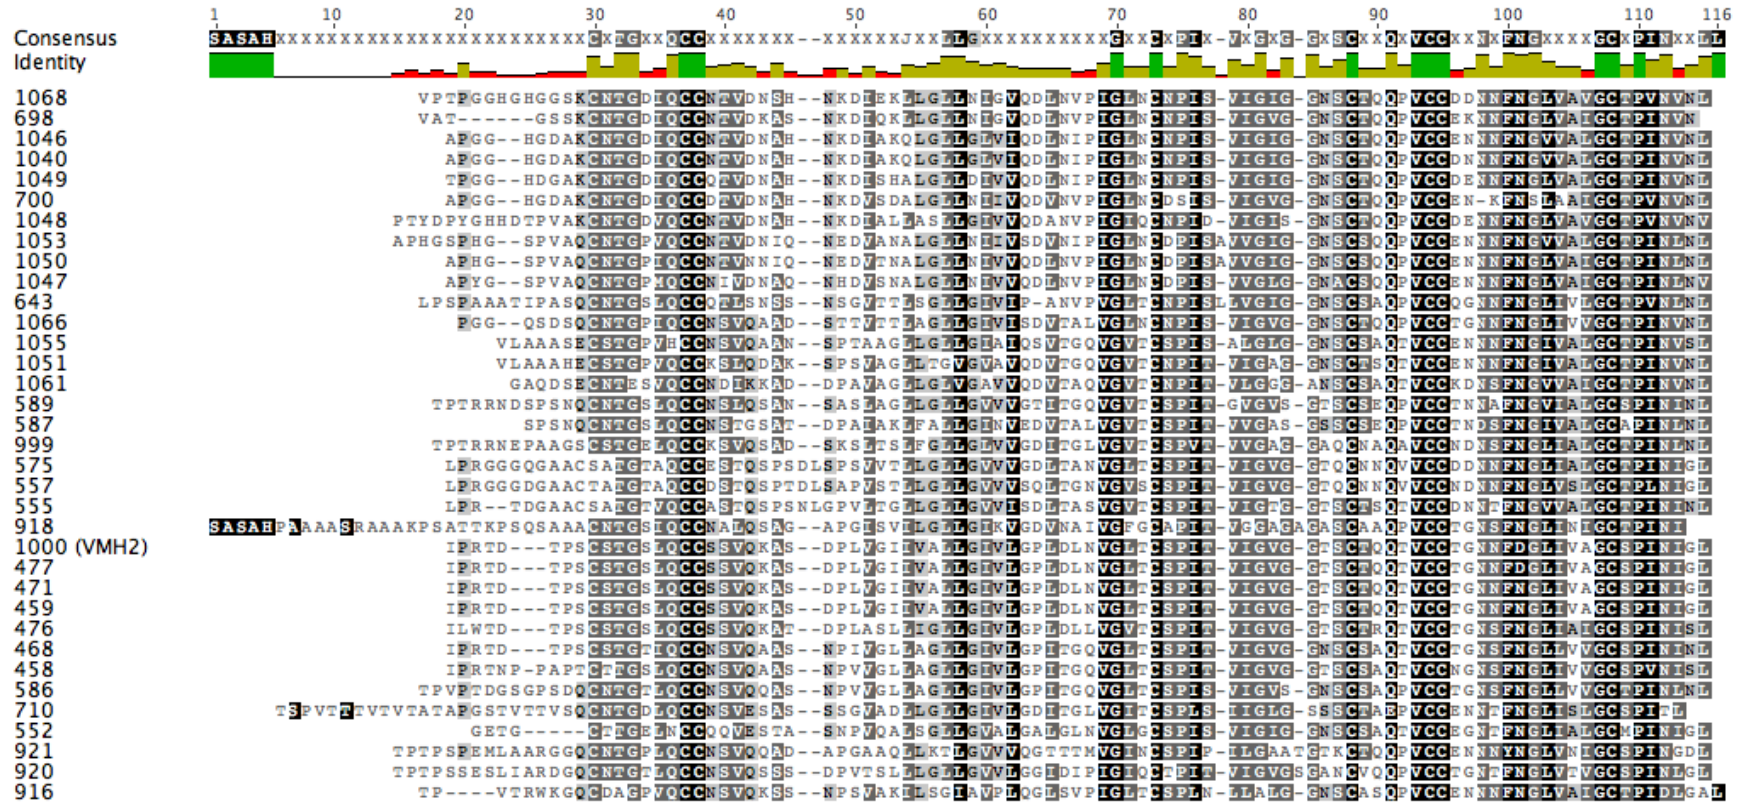

Supplementary Figure 6I. Sequence alignment and corresponding consensus sequence of proteins contained in Region 5 (full sequence)



**Supplementary Figure 6J** Sequence alignment and corresponding consensus sequence of proteins contained in **Region 5** (without N terminus region preceding first cysteine of the eight-cysteine pattern)





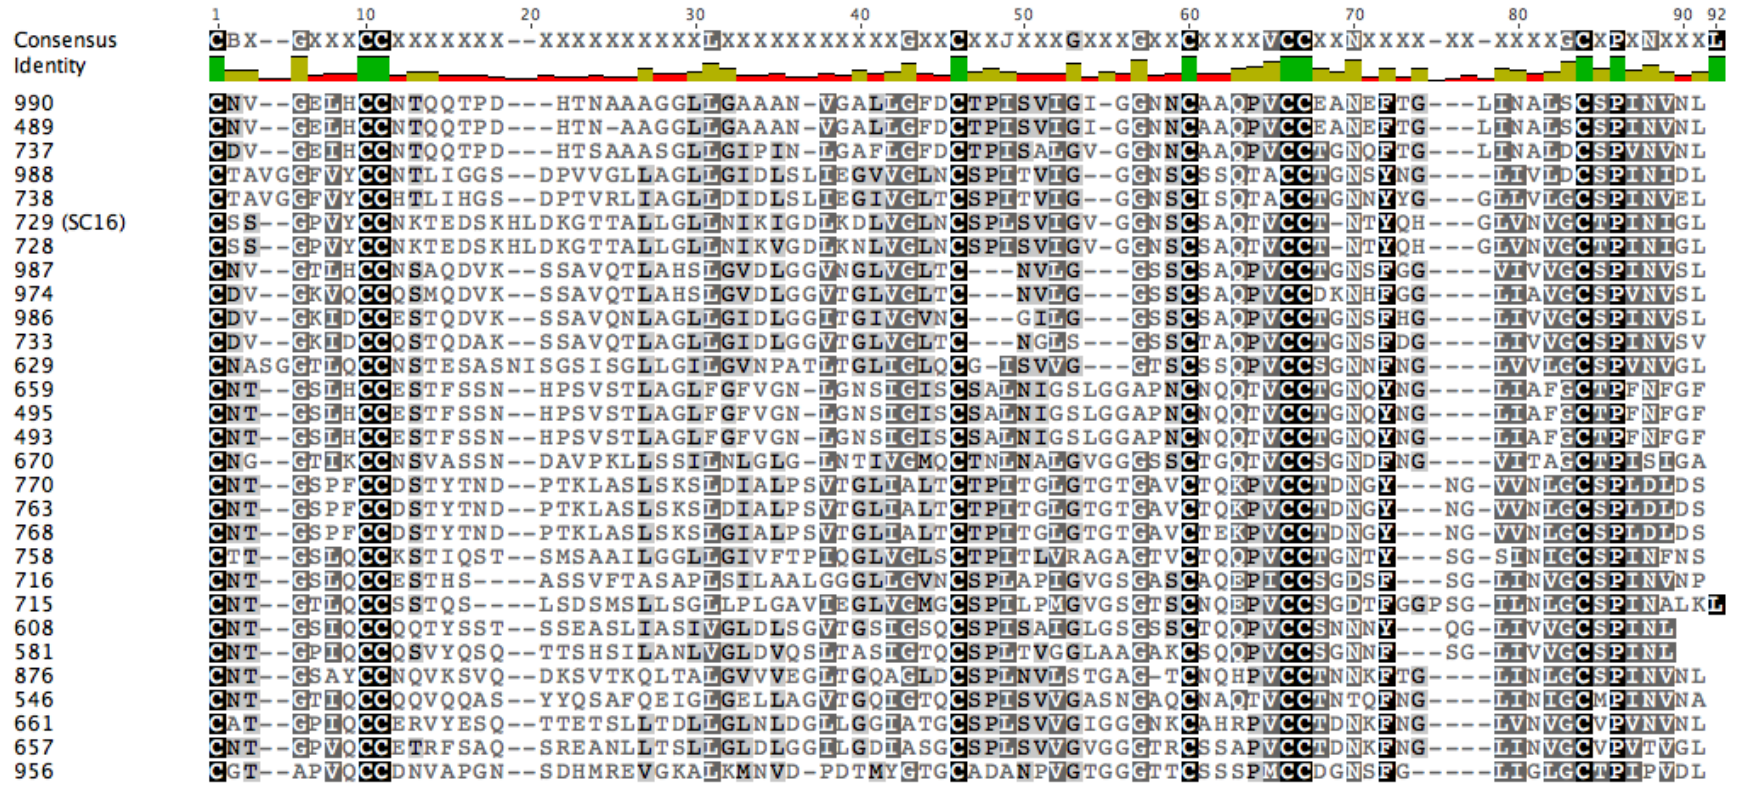

Supplementary Figure 6L. Sequence alignment and corresponding consensus sequence of proteins contained in Region 6 (without N terminus region preceding first cysteine of the eight-cysteine pattern)



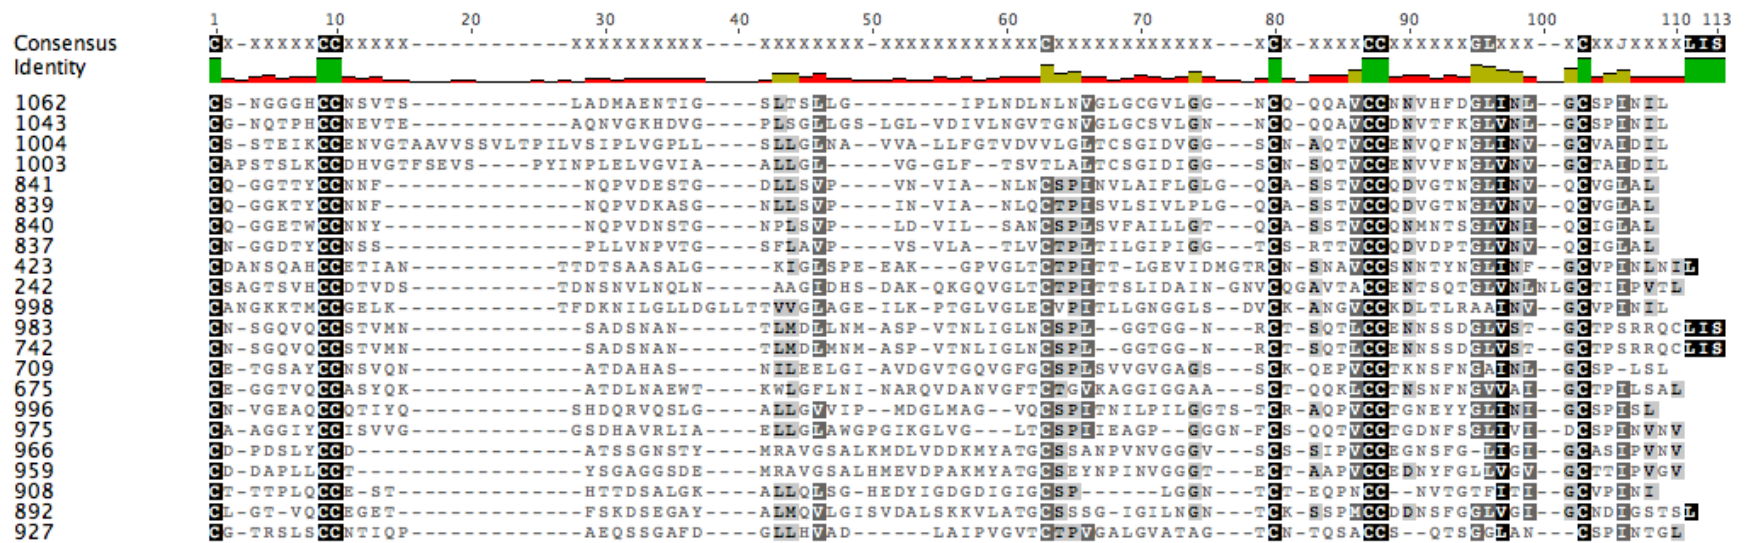

**Supplementary Figure 6N.** Sequence alignment and corresponding consensus sequence of proteins contained in **Region 7** (without N terminus region preceding first cysteine of the eight-cysteine pattern)



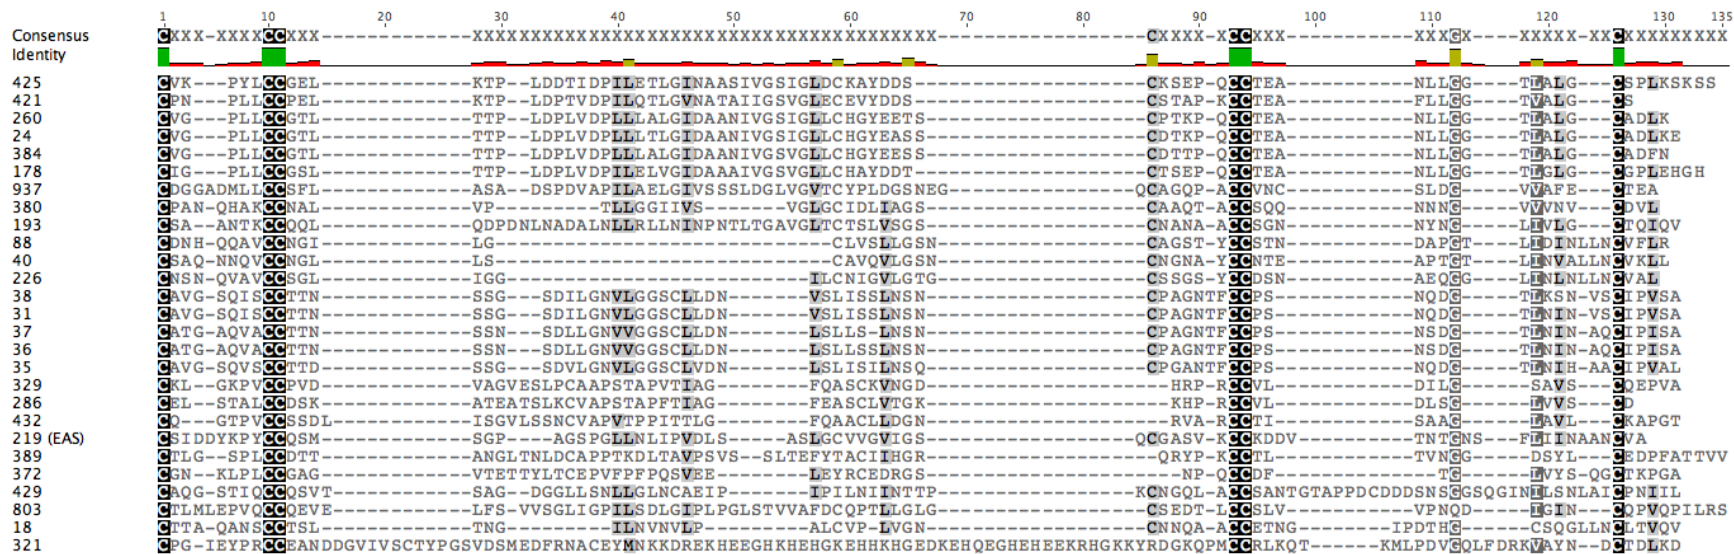

**Supplementary Figure 6P.** Sequence alignment and corresponding consensus sequence of proteins contained in **Region 8** (without N terminus region preceding first cysteine of the eight-cysteine pattern)



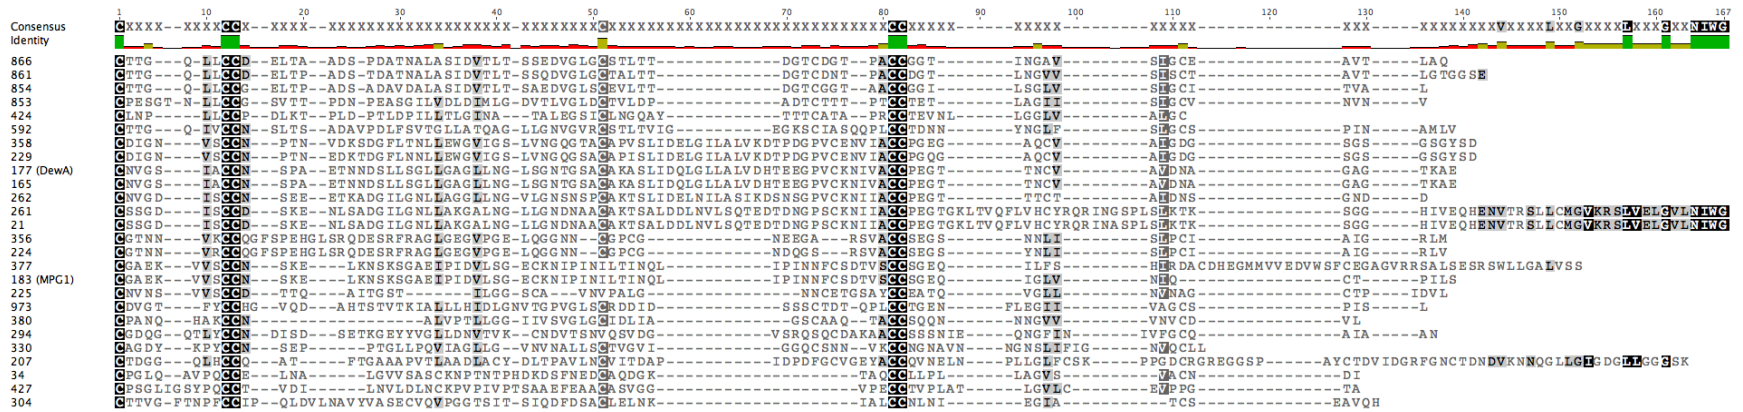

**Supplementary Figure 6R.** Sequence alignment and corresponding consensus sequence of proteins contained in **Region 9** (without N terminus region preceding first cysteine of the eight-cysteine pattern)

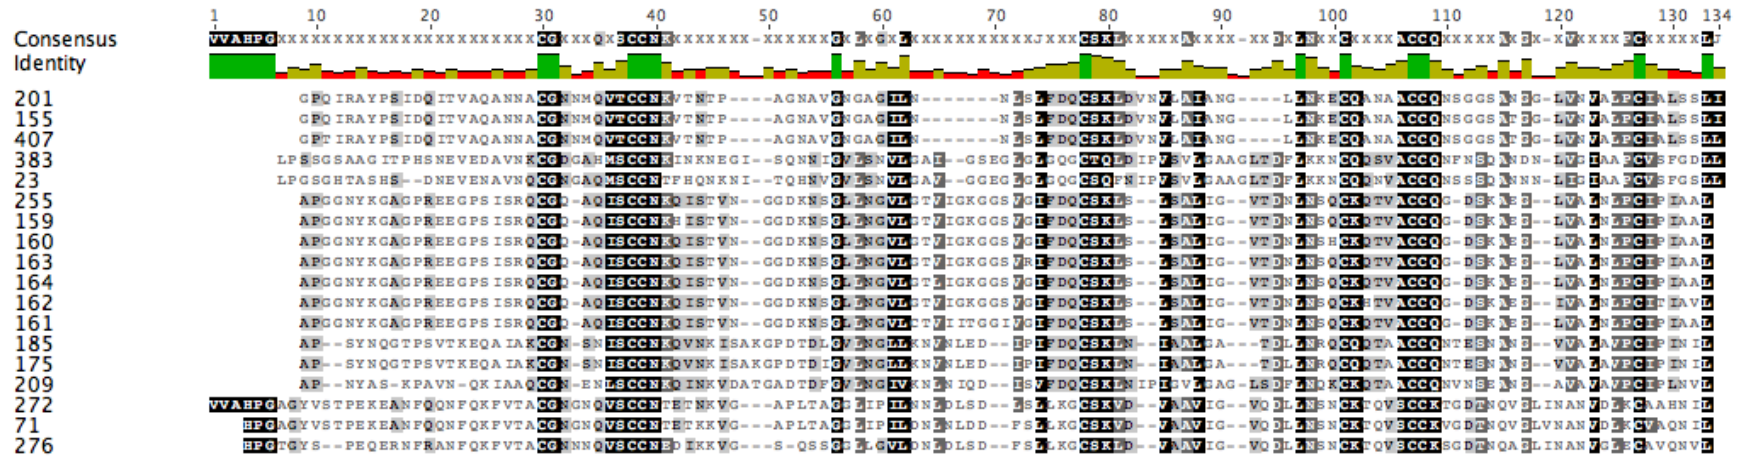

Supplementary Figure 6S. Sequence alignment and corresponding consensus sequence of proteins contained in Region 10 (full sequence)



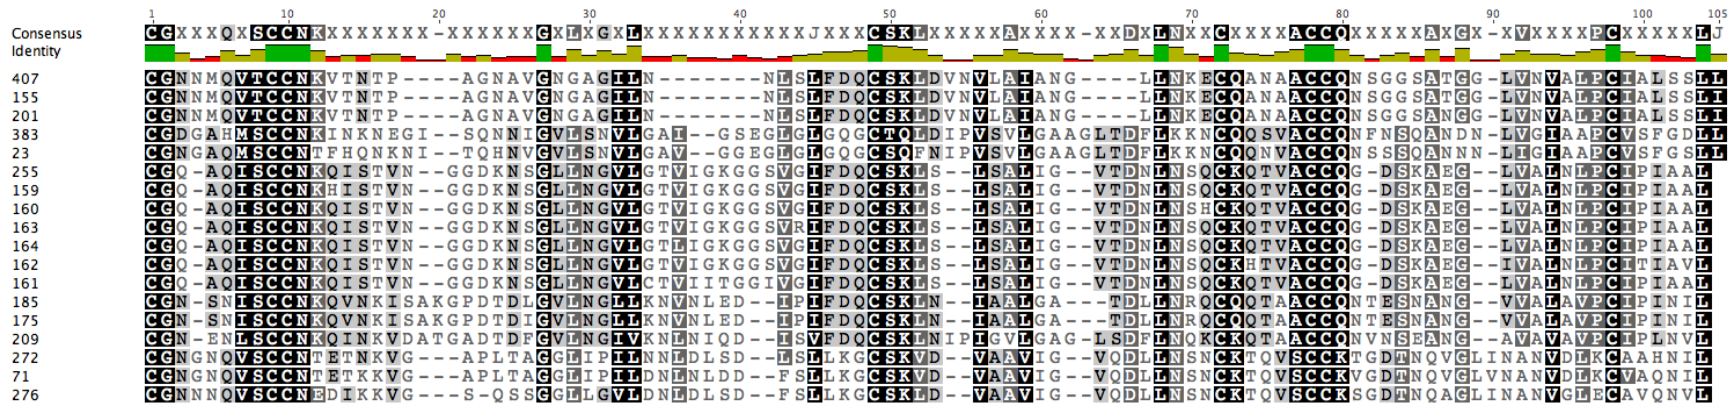

**Supplementary Figure 6T.** Sequence alignment and corresponding consensus sequence of proteins contained in **Region 10** (without N terminus region preceding first cysteine of the eight-cysteine pattern)

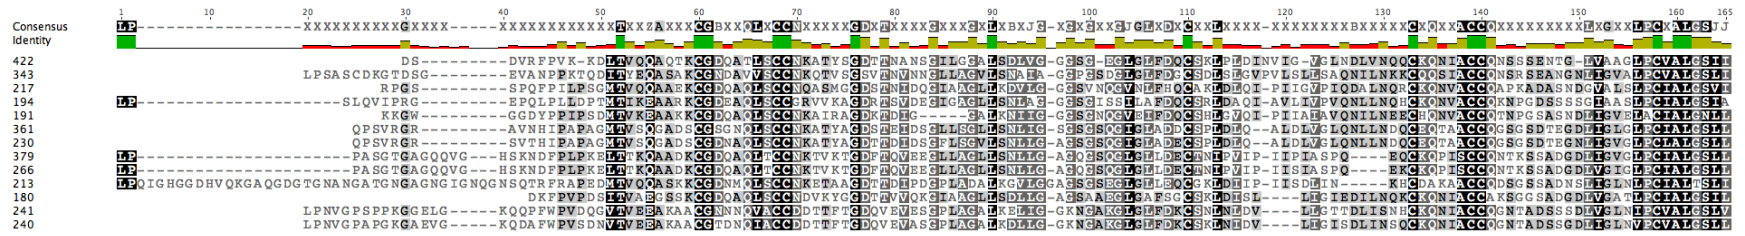

**Supplementary Figure 6U.** Sequence alignment and corresponding consensus sequence of proteins contained in **Region 11** (full sequence)

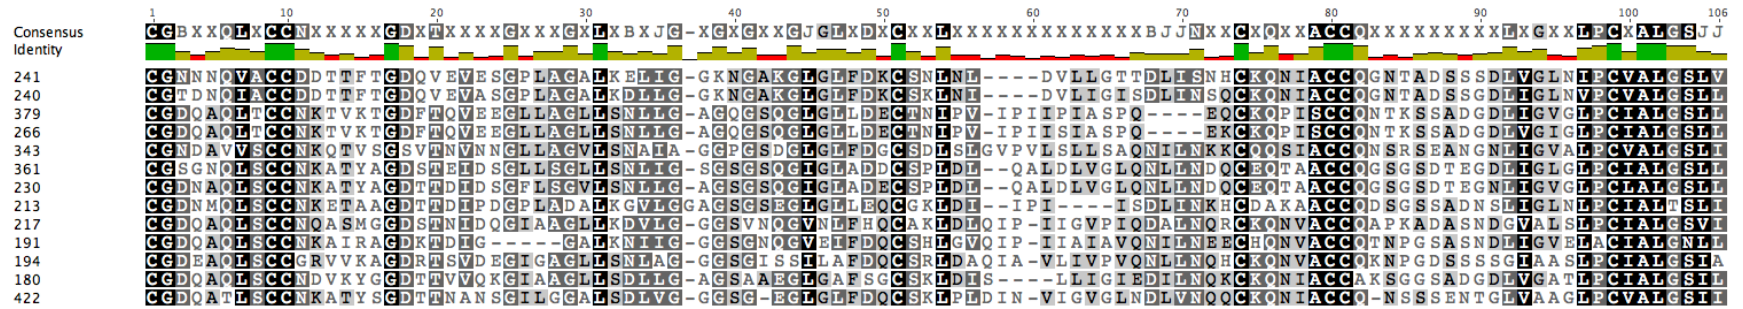

**Supplementary Figure 6V.** Sequence alignment and corresponding consensus sequence of proteins contained in **Region 11** (without N terminus region preceding first cysteine of the eight-cysteine pattern)

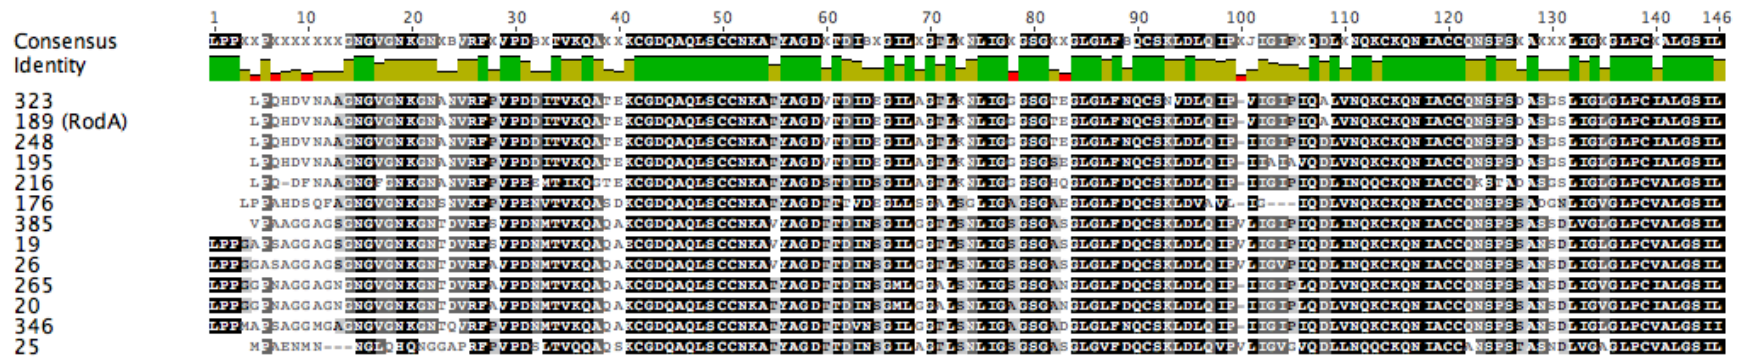

**Supplementary Figure 6W.** Sequence alignment and corresponding consensus sequence of proteins contained in **Region 12** (full sequence)

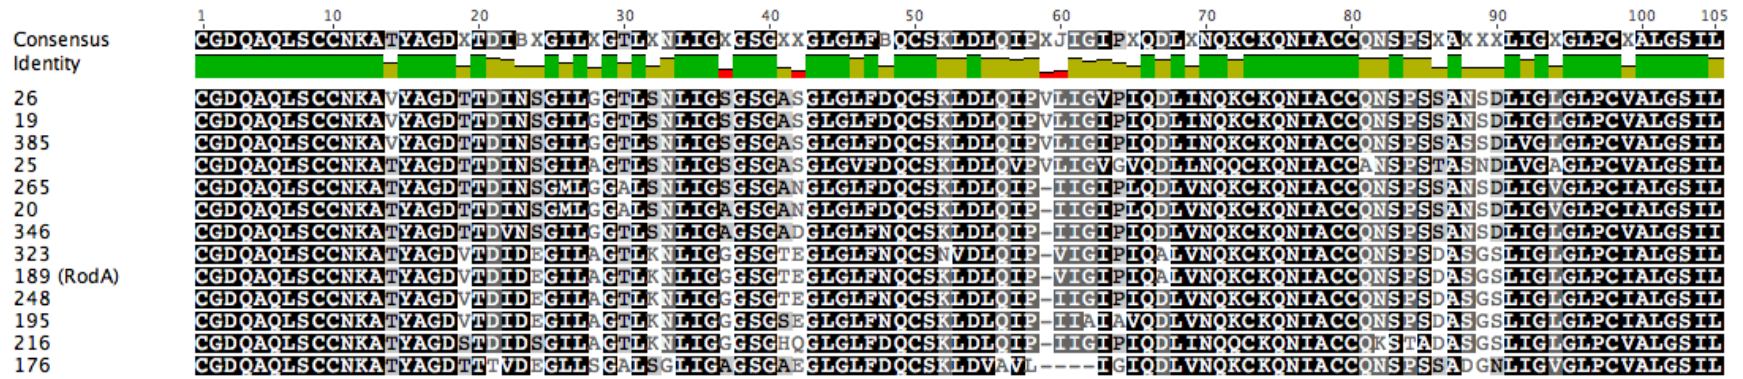

**Supplementary Figure X.** Sequence alignment and corresponding consensus sequence of proteins contained in **Region 12** (without N terminus region preceding first cysteine of the eight-cysteine pattern)



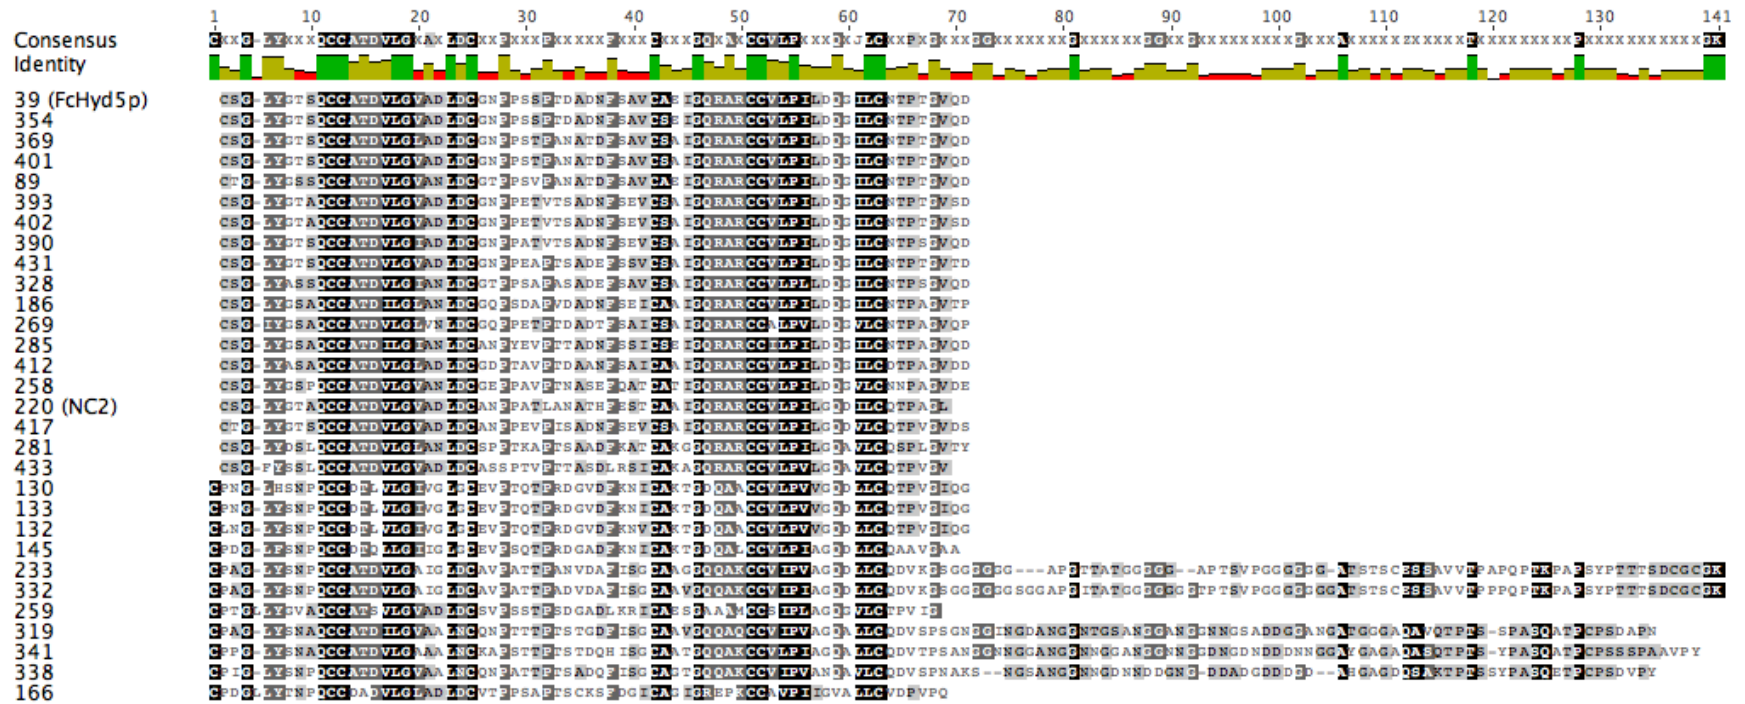

**Supplementary Figure 6Z.** Sequence alignment and corresponding consensus sequence of proteins contained in **Region 14** (without N terminus region preceding first cysteine of the eight-cysteine pattern)

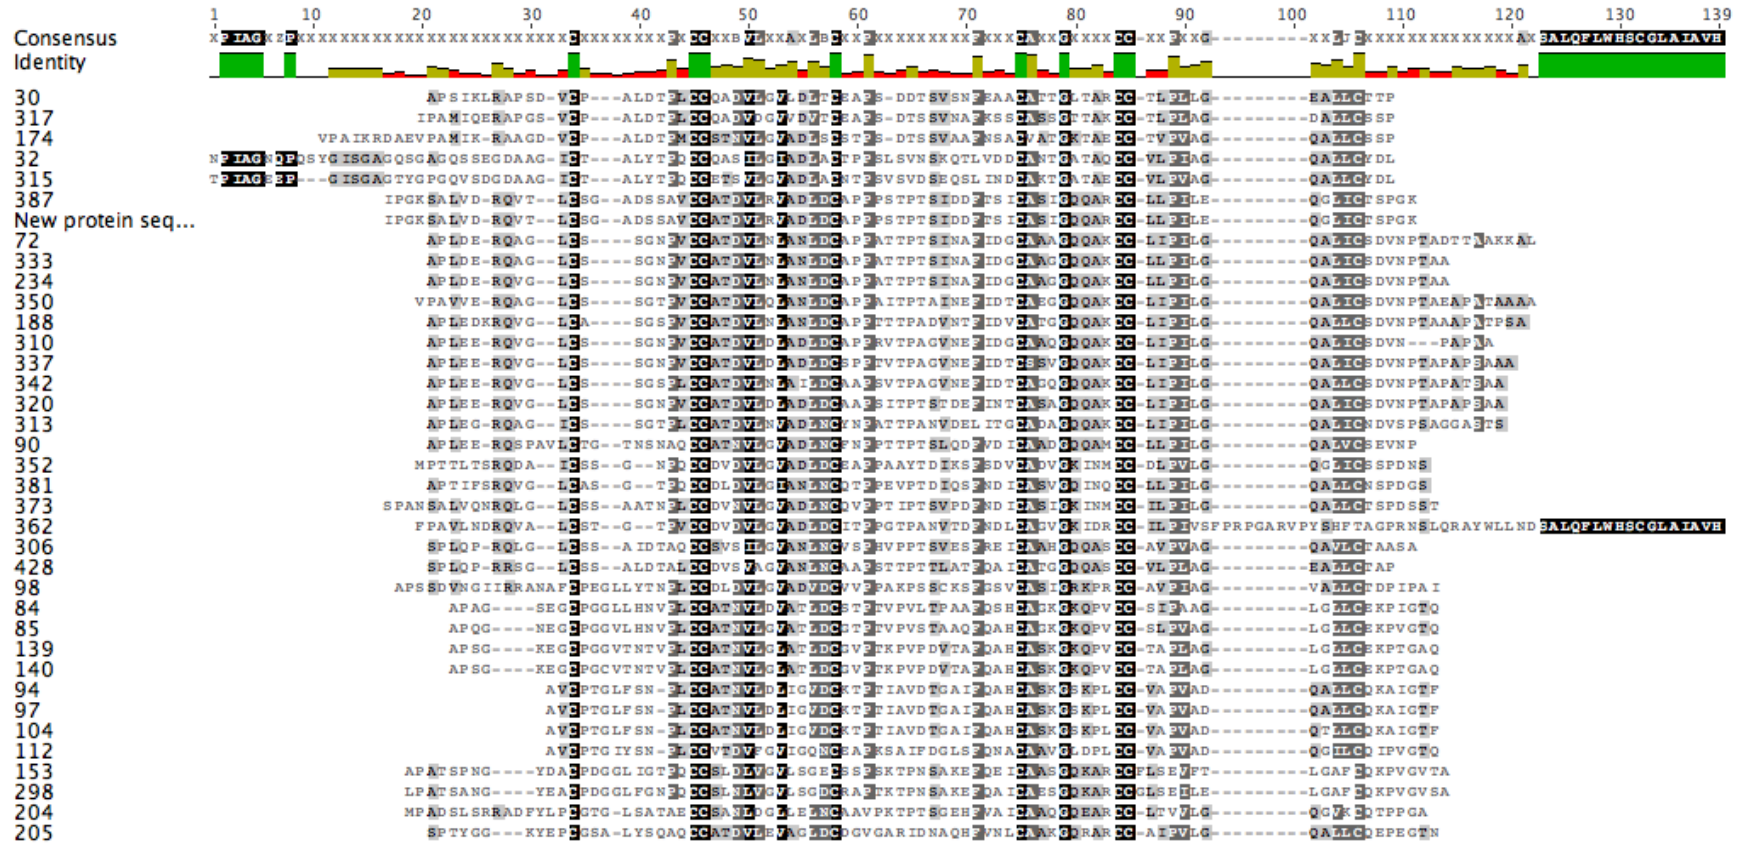

Supplementary Figure 6AA. Sequence alignment and corresponding consensus sequence of proteins contained in Region 14 (full sequence)



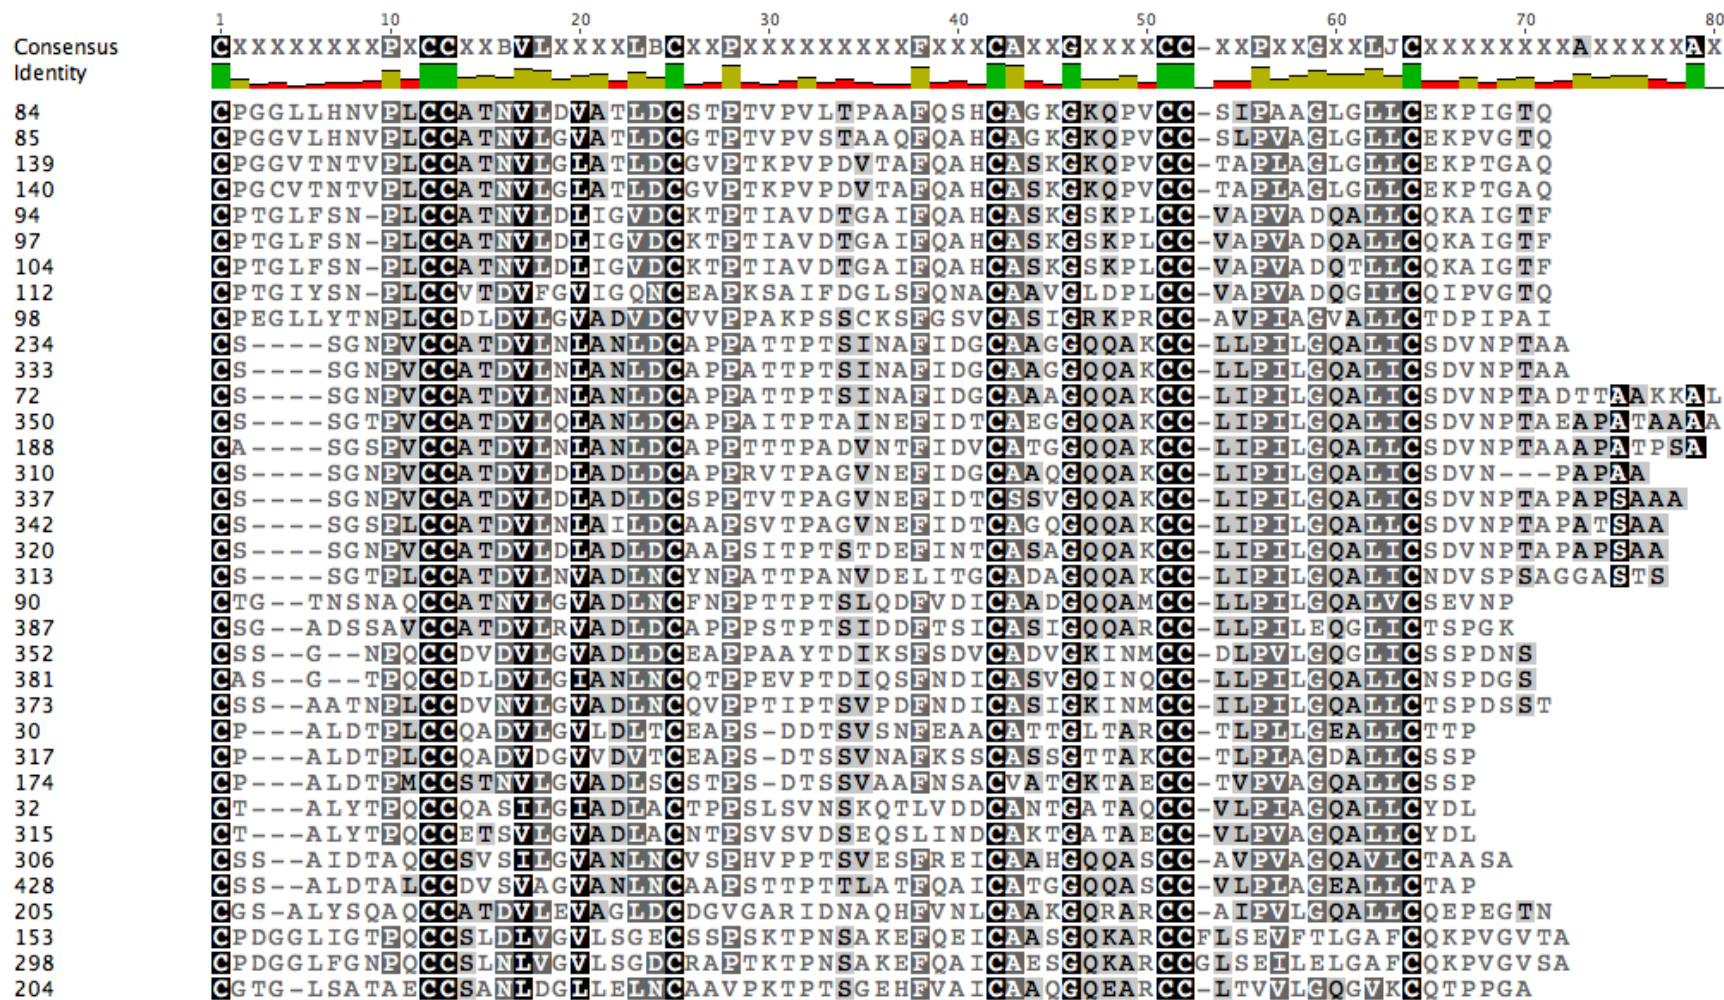

**Supplementary Figure 6AB.** Sequence alignment and corresponding consensus sequence of proteins contained in **Region 14** (without N terminus region preceding first cysteine of the eight-cysteine pattern)



**Table 2B. Identities of region 2 (without N-terminus region preceding first cysteine of the eight-cysteine pattern)**

|      | 1037 | 884  | 753  | 751  | 849  | 964  | 438  | 811  | 942  | 842  | 902  | 893  | 930  | 848  | 814  | 639  | 933  | 931  | 899  | 822  | 815  | 951  | 833  | 834  | 821  | 830  | 812  | 442  | 828  |
|------|------|------|------|------|------|------|------|------|------|------|------|------|------|------|------|------|------|------|------|------|------|------|------|------|------|------|------|------|------|
| 1037 | ████ | 56%  | 57%  | 48%  | 56%  | 51%  | 54%  | 55%  | 54%  | 57%  | 57%  | 56%  | 54%  | 52%  | 51%  | 57%  | 54%  | 62%  | 60%  | 58%  | 56%  | 53%  | 59%  | 53%  | 54%  | 58%  | 54%  | 64%  | 62%  |
| 884  | 56%  | ████ | 51%  | 45%  | 56%  | 50%  | 54%  | 56%  | 58%  | 59%  | 58%  | 53%  | 57%  | 56%  | 53%  | 59%  | 52%  | 58%  | 56%  | 49%  | 49%  | 49%  | 54%  | 46%  | 47%  | 47%  | 51%  | 56%  | 60%  |
| 753  | 57%  | 51%  | ████ | 68%  | 67%  | 55%  | 56%  | 57%  | 51%  | 57%  | 48%  | 52%  | 48%  | 57%  | 57%  | 52%  | 54%  | 58%  | 51%  | 54%  | 51%  | 51%  | 63%  | 54%  | 63%  | 57%  | 57%  | 63%  | 60%  |
| 751  | 48%  | 45%  | 68%  | ████ | 64%  | 55%  | 59%  | 60%  | 51%  | 56%  | 49%  | 54%  | 46%  | 54%  | 56%  | 56%  | 52%  | 54%  | 46%  | 54%  | 49%  | 47%  | 57%  | 49%  | 52%  | 49%  | 49%  | 56%  | 53%  |
| 849  | 56%  | 56%  | 67%  | 64%  | ████ | 64%  | 68%  | 73%  | 70%  | 70%  | 64%  | 62%  | 64%  | 70%  | 70%  | 68%  | 67%  | 68%  | 67%  | 64%  | 62%  | 56%  | 64%  | 49%  | 59%  | 53%  | 60%  | 70%  | 67%  |
| 964  | 51%  | 50%  | 55%  | 55%  | 64%  | ████ | 75%  | 78%  | 63%  | 64%  | 60%  | 63%  | 59%  | 58%  | 59%  | 63%  | 52%  | 59%  | 59%  | 56%  | 63%  | 53%  | 56%  | 46%  | 49%  | 49%  | 52%  | 54%  | 59%  |
| 438  | 54%  | 54%  | 56%  | 59%  | 68%  | 75%  | ████ | 75%  | 63%  | 68%  | 56%  | 60%  | 60%  | 54%  | 63%  | 64%  | 52%  | 58%  | 56%  | 53%  | 62%  | 57%  | 60%  | 51%  | 54%  | 49%  | 52%  | 63%  | 65%  |
| 811  | 55%  | 56%  | 57%  | 60%  | 73%  | 78%  | 75%  | ████ | 69%  | 69%  | 59%  | 63%  | 64%  | 67%  | 69%  | 69%  | 58%  | 62%  | 64%  | 60%  | 58%  | 57%  | 60%  | 51%  | 54%  | 52%  | 56%  | 63%  | 69%  |
| 942  | 54%  | 58%  | 51%  | 51%  | 70%  | 63%  | 63%  | 69%  | ████ | 73%  | 59%  | 58%  | 62%  | 62%  | 59%  | 64%  | 57%  | 62%  | 63%  | 57%  | 57%  | 46%  | 56%  | 47%  | 51%  | 51%  | 51%  | 59%  | 63%  |
| 842  | 57%  | 59%  | 57%  | 56%  | 70%  | 64%  | 68%  | 69%  | 73%  | ████ | 54%  | 52%  | 59%  | 57%  | 57%  | 60%  | 58%  | 64%  | 60%  | 63%  | 58%  | 51%  | 53%  | 48%  | 51%  | 48%  | 54%  | 62%  | 64%  |
| 902  | 57%  | 58%  | 48%  | 49%  | 64%  | 60%  | 56%  | 59%  | 59%  | 54%  | ████ | 68%  | 65%  | 67%  | 65%  | 68%  | 58%  | 64%  | 59%  | 57%  | 46%  | 51%  | 51%  | 41%  | 46%  | 46%  | 49%  | 53%  | 53%  |
| 893  | 56%  | 53%  | 52%  | 54%  | 62%  | 63%  | 60%  | 63%  | 58%  | 52%  | 68%  | ████ | 65%  | 60%  | 64%  | 62%  | 52%  | 59%  | 59%  | 52%  | 53%  | 47%  | 52%  | 48%  | 53%  | 49%  | 47%  | 56%  | 53%  |
| 930  | 54%  | 57%  | 48%  | 46%  | 64%  | 59%  | 60%  | 64%  | 62%  | 59%  | 65%  | 65%  | ████ | 60%  | 59%  | 62%  | 57%  | 58%  | 64%  | 57%  | 56%  | 56%  | 59%  | 47%  | 51%  | 52%  | 54%  | 62%  | 63%  |
| 848  | 52%  | 56%  | 57%  | 54%  | 70%  | 58%  | 54%  | 67%  | 62%  | 57%  | 67%  | 60%  | 60%  | ████ | 85%  | 78%  | 60%  | 60%  | 64%  | 56%  | 54%  | 63%  | 53%  | 59%  | 53%  | 65%  | 59%  | 60%  |      |
| 814  | 51%  | 53%  | 57%  | 56%  | 70%  | 59%  | 63%  | 69%  | 59%  | 57%  | 65%  | 64%  | 59%  | 85%  | ████ | 80%  | 59%  | 62%  | 60%  | 58%  | 56%  | 56%  | 62%  | 52%  | 59%  | 52%  | 64%  | 57%  | 64%  |
| 639  | 57%  | 59%  | 52%  | 56%  | 68%  | 63%  | 64%  | 69%  | 64%  | 60%  | 68%  | 62%  | 62%  | 78%  | 80%  | ████ | 56%  | 70%  | 60%  | 59%  | 56%  | 57%  | 62%  | 56%  | 52%  | 51%  | 59%  | 58%  | 65%  |
| 933  | 54%  | 52%  | 54%  | 52%  | 67%  | 52%  | 52%  | 58%  | 57%  | 58%  | 58%  | 52%  | 57%  | 60%  | 59%  | 56%  | ████ | 69%  | 67%  | 60%  | 53%  | 52%  | 57%  | 46%  | 49%  | 44%  | 51%  | 59%  | 56%  |
| 931  | 62%  | 58%  | 58%  | 54%  | 68%  | 59%  | 58%  | 62%  | 64%  | 64%  | 59%  | 58%  | 60%  | 62%  | 70%  | 69%  | 64%  | ████ | 64%  | 63%  | 53%  | 54%  | 60%  | 48%  | 49%  | 48%  | 53%  | 60%  | 58%  |
| 899  | 60%  | 56%  | 51%  | 46%  | 67%  | 59%  | 56%  | 64%  | 63%  | 60%  | 59%  | 59%  | 64%  | 64%  | 60%  | 60%  | 67%  | 64%  | ████ | 60%  | 60%  | 51%  | 53%  | 44%  | 53%  | 47%  | 52%  | 59%  | 58%  |
| 822  | 58%  | 49%  | 54%  | 54%  | 64%  | 56%  | 53%  | 60%  | 57%  | 63%  | 57%  | 52%  | 57%  | 56%  | 58%  | 59%  | 60%  | 63%  | 60%  | ████ | 54%  | 57%  | 54%  | 51%  | 57%  | 57%  | 56%  | 60%  | 58%  |
| 815  | 56%  | 49%  | 51%  | 49%  | 62%  | 63%  | 62%  | 58%  | 57%  | 58%  | 46%  | 53%  | 56%  | 56%  | 56%  | 56%  | 53%  | 53%  | 60%  | 54%  | ████ | 51%  | 56%  | 47%  | 49%  | 48%  | 56%  | 58%  | 62%  |
| 951  | 53%  | 49%  | 51%  | 47%  | 56%  | 53%  | 57%  | 57%  | 46%  | 51%  | 51%  | 47%  | 56%  | 54%  | 56%  | 57%  | 52%  | 54%  | 51%  | 57%  | 51%  | ████ | 73%  | 58%  | 58%  | 63%  | 60%  | 64%  | 59%  |
| 833  | 59%  | 54%  | 63%  | 57%  | 64%  | 56%  | 60%  | 60%  | 56%  | 53%  | 51%  | 52%  | 59%  | 63%  | 62%  | 62%  | 57%  | 60%  | 53%  | 54%  | 56%  | 73%  | ████ | 70%  | 72%  | 72%  | 69%  | 70%  | 65%  |
| 834  | 53%  | 46%  | 54%  | 49%  | 49%  | 46%  | 51%  | 51%  | 47%  | 48%  | 41%  | 48%  | 47%  | 53%  | 52%  | 56%  | 46%  | 48%  | 44%  | 51%  | 47%  | 58%  | 70%  | ████ | 78%  | 73%  | 65%  | 56%  | 52%  |
| 821  | 54%  | 47%  | 63%  | 52%  | 59%  | 49%  | 54%  | 54%  | 51%  | 51%  | 46%  | 53%  | 51%  | 59%  | 59%  | 52%  | 49%  | 49%  | 53%  | 57%  | 49%  | 58%  | 72%  | 78%  | ████ | 78%  | 70%  | 58%  | 57%  |
| 830  | 58%  | 47%  | 57%  | 49%  | 53%  | 49%  | 49%  | 52%  | 51%  | 48%  | 46%  | 49%  | 52%  | 53%  | 52%  | 51%  | 44%  | 48%  | 47%  | 57%  | 48%  | 63%  | 72%  | 73%  | 78%  | ████ | 69%  | 62%  | 57%  |
| 812  | 54%  | 51%  | 57%  | 49%  | 60%  | 52%  | 52%  | 56%  | 51%  | 54%  | 49%  | 47%  | 54%  | 65%  | 64%  | 59%  | 51%  | 53%  | 52%  | 56%  | 56%  | 60%  | 69%  | 65%  | 70%  | 69%  | ████ | 67%  | 59%  |
| 442  | 64%  | 56%  | 63%  | 56%  | 70%  | 54%  | 63%  | 63%  | 59%  | 62%  | 53%  | 56%  | 62%  | 59%  | 57%  | 58%  | 59%  | 60%  | 59%  | 60%  | 58%  | 64%  | 70%  | 56%  | 58%  | 62%  | 67%  | ████ | 70%  |
| 828  | 62%  | 60%  | 60%  | 53%  | 67%  | 59%  | 65%  | 69%  | 63%  | 64%  | 53%  | 53%  | 63%  | 60%  | 64%  | 65%  | 56%  | 58%  | 58%  | 58%  | 62%  | 59%  | 65%  | 52%  | 57%  | 57%  | 59%  | 70%  | ████ |



Table 2D. Identities of region 4 (without N-terminus region preceding first cysteine of the eight-cysteine pattern)

|           | 1067 | 642 | 1058 | 631 | 650 | 647 | 649 | 648 | 1056 | 1034 | 629  | 628  | 635 | 1054 | 798 | 1064 | 469  | 460  | 475  | 567 | 885 | 711 | 583 | 915  | 540  | 485  | 484  | 483  | 480 (S... | 541  | 1060 | 697 | 1038 |     |
|-----------|------|-----|------|-----|-----|-----|-----|-----|------|------|------|------|-----|------|-----|------|------|------|------|-----|-----|-----|-----|------|------|------|------|------|-----------|------|------|-----|------|-----|
| 1067      |      | 61% | 63%  | 65% | 58% | 57% | 52% | 52% | 57%  | 58%  | 60%  | 60%  | 59% | 64%  | 65% | 61%  | 49%  | 49%  | 49%  | 57% | 53% | 51% | 56% | 57%  | 57%  | 50%  | 50%  | 50%  | 50%       | 57%  | 45%  | 44% | 52%  |     |
| 642       | 61%  |     | 67%  | 66% | 66% | 62% | 62% | 62% | 57%  | 55%  | 55%  | 55%  | 54% | 59%  | 61% | 54%  | 48%  | 48%  | 48%  | 56% | 56% | 54% | 55% | 52%  | 52%  | 48%  | 48%  | 48%  | 48%       | 52%  | 48%  | 46% | 59%  |     |
| 1058      | 63%  | 67% |      | 84% | 74% | 78% | 78% | 78% | 62%  | 67%  | 70%  | 70%  | 70% | 73%  | 71% | 67%  | 62%  | 62%  | 61%  | 68% | 68% | 59% | 57% | 66%  | 66%  | 59%  | 59%  | 59%  | 59%       | 60%  | 53%  | 48% | 60%  |     |
| 631       | 65%  | 66% | 84%  |     | 68% | 70% | 70% | 71% | 66%  | 66%  | 71%  | 71%  | 71% | 71%  | 70% | 66%  | 60%  | 60%  | 60%  | 60% | 70% | 63% | 59% | 55%  | 61%  | 53%  | 53%  | 53%  | 53%       | 59%  | 51%  | 51% | 55%  |     |
| 650       | 58%  | 66% | 74%  | 68% |     | 83% | 78% | 79% | 57%  | 57%  | 63%  | 63%  | 63% | 62%  | 71% | 66%  | 63%  | 63%  | 62%  | 72% | 65% | 66% | 56% | 63%  | 63%  | 62%  | 62%  | 62%  | 62%       | 60%  | 53%  | 52% | 59%  |     |
| 647       | 57%  | 62% | 78%  | 70% | 83% |     | 78% | 79% | 57%  | 60%  | 60%  | 60%  | 60% | 63%  | 70% | 62%  | 65%  | 65%  | 63%  | 70% | 66% | 66% | 56% | 66%  | 60%  | 60%  | 60%  | 60%  | 64%       | 54%  | 51%  | 59% |      |     |
| 649       | 52%  | 62% | 78%  | 70% | 78% | 78% |     | 99% | 56%  | 54%  | 59%  | 59%  | 59% | 59%  | 66% | 62%  | 68%  | 68%  | 67%  | 63% | 73% | 64% | 59% | 63%  | 63%  | 56%  | 56%  | 56%  | 56%       | 58%  | 52%  | 48% | 57%  |     |
| 648       | 52%  | 62% | 78%  | 71% | 79% | 79% | 99% |     | 57%  | 55%  | 60%  | 60%  | 60% | 59%  | 67% | 63%  | 70%  | 70%  | 68%  | 65% | 73% | 65% | 59% | 63%  | 63%  | 56%  | 56%  | 56%  | 58%       | 51%  | 47%  | 57% |      |     |
| 1056      | 57%  | 57% | 62%  | 66% | 57% | 57% | 56% | 57% |      | 89%  | 74%  | 74%  | 74% | 82%  | 78% | 57%  | 60%  | 60%  | 60%  | 60% | 59% | 63% | 54% | 54%  | 54%  | 52%  | 52%  | 52%  | 52%       | 57%  | 53%  | 52% | 55%  |     |
| 1034      | 58%  | 55% | 67%  | 66% | 57% | 60% | 54% | 55% | 89%  |      | 77%  | 77%  | 76% | 83%  | 74% | 60%  | 56%  | 56%  | 56%  | 60% | 57% | 61% | 54% | 54%  | 54%  | 53%  | 53%  | 53%  | 53%       | 57%  | 54%  | 54% | 58%  |     |
| 629       | 60%  | 55% | 70%  | 71% | 63% | 60% | 59% | 60% | 74%  | 77%  |      | 100% | 99% | 89%  | 74% | 72%  | 62%  | 62%  | 61%  | 65% | 57% | 60% | 56% | 59%  | 59%  | 58%  | 58%  | 58%  | 58%       | 61%  | 57%  | 55% | 57%  |     |
| 628       | 60%  | 55% | 70%  | 71% | 63% | 60% | 59% | 60% | 74%  | 77%  | 100% |      | 99% | 89%  | 74% | 72%  | 62%  | 62%  | 61%  | 65% | 57% | 60% | 56% | 59%  | 59%  | 58%  | 58%  | 58%  | 58%       | 61%  | 57%  | 55% | 57%  |     |
| 635       | 59%  | 54% | 70%  | 71% | 63% | 60% | 59% | 60% | 74%  | 76%  | 99%  | 99%  |     | 88%  | 74% | 71%  | 62%  | 62%  | 61%  | 63% | 57% | 60% | 55% | 59%  | 57%  | 57%  | 57%  | 57%  | 57%       | 61%  | 57%  | 55% | 57%  |     |
| 1054      | 64%  | 59% | 73%  | 71% | 62% | 63% | 59% | 59% | 82%  | 83%  | 99%  | 89%  | 88% |      | 70% | 70%  | 60%  | 60%  | 59%  | 62% | 63% | 61% | 63% | 63%  | 63%  | 59%  | 59%  | 59%  | 59%       | 65%  | 59%  | 58% | 61%  |     |
| 798       | 65%  | 61% | 71%  | 70% | 71% | 70% | 66% | 67% | 74%  | 74%  | 74%  | 74%  | 74% | 79%  |     | 67%  | 60%  | 60%  | 60%  | 62% | 68% | 68% | 56% | 67%  | 59%  | 59%  | 59%  | 59%  | 65%       | 57%  | 55%  | 63% |      |     |
| 1064      | 61%  | 54% | 67%  | 66% | 66% | 62% | 62% | 63% | 57%  | 60%  | 72%  | 72%  | 71% | 70%  | 67% |      | 60%  | 60%  | 59%  | 65% | 59% | 56% | 56% | 59%  | 59%  | 56%  | 56%  | 56%  | 60%       | 57%  | 52%  | 59% |      |     |
| 469       | 49%  | 48% | 62%  | 60% | 63% | 65% | 68% | 70% | 60%  | 56%  | 62%  | 62%  | 62% | 60%  | 60% | 60%  |      | 100% | 100% | 99% | 67% | 60% | 63% | 57%  | 63%  | 63%  | 62%  | 62%  | 62%       | 60%  | 57%  | 53% | 52%  |     |
| 460       | 49%  | 48% | 62%  | 60% | 63% | 65% | 68% | 70% | 60%  | 56%  | 62%  | 62%  | 62% | 60%  | 60% | 60%  | 100% |      | 99%  | 99% | 67% | 60% | 63% | 57%  | 63%  | 62%  | 62%  | 62%  | 60%       | 57%  | 53%  | 52% |      |     |
| 475       | 49%  | 48% | 61%  | 60% | 62% | 63% | 67% | 68% | 60%  | 56%  | 61%  | 61%  | 61% | 59%  | 60% | 59%  | 99%  | 99%  |      | 67% | 60% | 63% | 57% | 63%  | 63%  | 60%  | 60%  | 60%  | 60%       | 59%  | 57%  | 53% | 52%  |     |
| 567       | 57%  | 56% | 68%  | 70% | 72% | 70% | 63% | 65% | 60%  | 60%  | 65%  | 65%  | 63% | 62%  | 62% | 65%  | 67%  | 67%  | 67%  |     | 55% | 63% | 59% | 65%  | 65%  | 67%  | 67%  | 67%  | 67%       | 59%  | 55%  | 53% | 57%  |     |
| 885       | 53%  | 56% | 68%  | 63% | 65% | 66% | 73% | 73% | 59%  | 57%  | 57%  | 57%  | 57% | 63%  | 68% | 59%  | 60%  | 60%  | 60%  | 55% |     | 75% | 61% | 64%  | 64%  | 57%  | 57%  | 57%  | 57%       | 61%  | 55%  | 51% | 54%  |     |
| 711       | 51%  | 54% | 59%  | 59% | 66% | 66% | 64% | 65% | 63%  | 61%  | 60%  | 60%  | 60% | 61%  | 68% | 56%  | 63%  | 63%  | 63%  | 59% | 61% |     | 63% | 62%  | 62%  | 65%  | 65%  | 65%  | 62%       | 56%  | 52%  | 58% |      |     |
| 583       | 56%  | 55% | 57%  | 55% | 56% | 56% | 59% | 59% | 54%  | 54%  | 56%  | 56%  | 55% | 63%  | 56% | 56%  | 57%  | 57%  | 57%  | 59% | 61% | 63% |     | 62%  | 62%  | 56%  | 56%  | 56%  | 58%       | 51%  | 46%  | 54% |      |     |
| 915       | 57%  | 52% | 66%  | 61% | 63% | 66% | 63% | 63% | 54%  | 54%  | 59%  | 59%  | 59% | 63%  | 67% | 59%  | 63%  | 63%  | 63%  | 65% | 64% | 62% | 62% |      | 100% | 70%  | 70%  | 70%  | 72%       | 55%  | 52%  | 65% |      |     |
| 540       | 57%  | 52% | 66%  | 61% | 63% | 66% | 63% | 63% | 54%  | 54%  | 59%  | 59%  | 59% | 63%  | 67% | 59%  | 63%  | 63%  | 63%  | 65% | 64% | 62% | 62% | 100% |      | 70%  | 70%  | 70%  | 72%       | 55%  | 52%  | 65% |      |     |
| 485       | 50%  | 48% | 59%  | 53% | 62% | 60% | 56% | 56% | 52%  | 53%  | 58%  | 58%  | 57% | 59%  | 59% | 56%  | 62%  | 62%  | 60%  | 67% | 57% | 65% | 56% | 70%  | 70%  |      | 100% | 100% | 100%      | 100% | 61%  | 54% | 60%  |     |
| 484       | 50%  | 48% | 59%  | 53% | 62% | 60% | 56% | 56% | 52%  | 53%  | 58%  | 58%  | 57% | 59%  | 59% | 56%  | 62%  | 62%  | 60%  | 67% | 57% | 65% | 56% | 70%  | 70%  | 100% |      | 100% | 100%      | 100% | 61%  | 54% | 60%  |     |
| 483       | 50%  | 48% | 59%  | 53% | 62% | 60% | 56% | 56% | 52%  | 53%  | 58%  | 58%  | 57% | 59%  | 59% | 56%  | 62%  | 62%  | 60%  | 67% | 57% | 65% | 56% | 70%  | 70%  | 100% | 100% |      | 100%      | 100% | 61%  | 54% | 60%  |     |
| 480 (SC3) | 50%  | 48% | 59%  | 53% | 62% | 60% | 56% | 56% | 52%  | 53%  | 58%  | 58%  | 57% | 59%  | 59% | 56%  | 62%  | 62%  | 60%  | 67% | 57% | 65% | 56% | 70%  | 70%  | 100% | 100% | 100% |           | 100% | 100% | 61% | 54%  | 60% |
| 541       | 57%  | 52% | 60%  | 59% | 60% | 64% | 58% | 58% | 57%  | 57%  | 61%  | 61%  | 61% | 65%  | 65% | 60%  | 60%  | 60%  | 59%  | 59% | 61% | 62% | 58% | 72%  | 72%  | 61%  | 61%  | 61%  | 61%       |      | 57%  | 55% | 61%  |     |
| 1060      | 45%  | 48% | 53%  | 51% | 53% | 54% | 52% | 51% | 53%  | 54%  | 57%  | 57%  | 57% | 59%  | 57% | 57%  | 57%  | 57%  | 55%  | 55% | 56% | 51% | 55% | 55%  | 54%  | 54%  | 54%  | 54%  | 54%       | 57%  |      | 90% | 63%  |     |
| 697       | 44%  | 46% | 48%  | 51% | 52% | 51% | 48% | 47% | 52%  | 54%  | 55%  | 55%  | 55% | 58%  | 55% | 52%  | 53%  | 53%  | 53%  | 53% | 51% | 52% | 46% | 52%  | 52%  | 50%  | 50%  | 50%  | 50%       | 55%  | 90%  |     | 61%  |     |
| 1038      | 52%  | 59% | 60%  | 55% | 59% | 59% | 57% | 57% | 55%  | 58%  | 57%  | 57%  | 57% | 61%  | 63% | 59%  | 52%  | 52%  | 52%  | 57% | 54% | 58% | 54% | 65%  | 65%  | 60%  | 60%  | 60%  | 60%       | 61%  | 63%  | 61% |      |     |

**Table 2E. Identities of region 5 (without N-terminus region preceding first cysteine of the eight-cysteine pattern)**

|             | 1068 | 698 | 700 | 1046 | 1040 | 1049 | 1048 | 1053 | 1050 | 1047 | 1055 | 1051 | 1061 | 589 | 587 | 999 | 575 | 557 | 555 | 918 | 1066 | 1000 (...) | 477  | 471  | 459 | 476 | 468 | 458 | 586 | 920 | 921 | 710 | 552 | 643 | 916 |
|-------------|------|-----|-----|------|------|------|------|------|------|------|------|------|------|-----|-----|-----|-----|-----|-----|-----|------|------------|------|------|-----|-----|-----|-----|-----|-----|-----|-----|-----|-----|-----|
| 1068        | 89%  | 79% | 84% | 85%  | 87%  | 82%  | 72%  | 77%  | 73%  | 52%  | 54%  | 54%  | 46%  | 50% | 49% | 52% | 48% | 51% | 53% | 66% | 48%  | 48%        | 49%  | 49%  | 49% | 54% | 51% | 56% | 54% | 48% | 48% | 50% | 63% | 51% |     |
| 698         | 89%  | 80% | 84% | 83%  | 84%  | 77%  | 72%  | 78%  | 78%  | 56%  | 57%  | 57%  | 49%  | 52% | 49% | 52% | 48% | 51% | 57% | 68% | 53%  | 53%        | 54%  | 54%  | 54% | 57% | 52% | 59% | 55% | 52% | 52% | 52% | 59% | 57% |     |
| 700         | 79%  | 80% | 74% | 73%  | 79%  | 70%  | 72%  | 75%  | 74%  | 49%  | 51%  | 50%  | 44%  | 44% | 45% | 46% | 45% | 44% | 53% | 62% | 46%  | 46%        | 48%  | 48%  | 49% | 51% | 49% | 54% | 48% | 45% | 48% | 46% | 55% | 45% |     |
| 1046        | 84%  | 84% | 74% | 73%  | 99%  | 88%  | 77%  | 76%  | 73%  | 60%  | 60%  | 57%  | 54%  | 54% | 51% | 51% | 51% | 47% | 46% | 67% | 50%  | 50%        | 51%  | 51%  | 50% | 54% | 49% | 56% | 54% | 53% | 54% | 52% | 60% | 52% |     |
| 1040        | 85%  | 83% | 73% | 99%  | 89%  | 89%  | 78%  | 76%  | 75%  | 59%  | 59%  | 57%  | 54%  | 54% | 51% | 52% | 47% | 58% | 53% | 67% | 50%  | 50%        | 51%  | 51%  | 50% | 54% | 49% | 56% | 54% | 52% | 53% | 51% | 60% | 51% |     |
| 1049        | 87%  | 84% | 79% | 88%  | 89%  | 79%  | 75%  | 77%  | 76%  | 54%  | 56%  | 54%  | 49%  | 50% | 51% | 53% | 49% | 53% | 56% | 66% | 51%  | 51%        | 52%  | 52%  | 52% | 54% | 49% | 56% | 54% | 49% | 51% | 52% | 61% | 48% |     |
| 1048        | 82%  | 77% | 70% | 77%  | 78%  | 78%  | 65%  | 66%  | 67%  | 51%  | 55%  | 54%  | 49%  | 52% | 48% | 46% | 44% | 48% | 51% | 62% | 46%  | 46%        | 48%  | 48%  | 49% | 54% | 52% | 59% | 54% | 51% | 48% | 44% | 59% | 48% |     |
| 1053        | 72%  | 72% | 72% | 77%  | 76%  | 75%  | 65%  | 89%  | 82%  | 59%  | 57%  | 55%  | 53%  | 55% | 48% | 48% | 45% | 51% | 51% | 61% | 45%  | 45%        | 46%  | 46%  | 43% | 51% | 47% | 55% | 51% | 49% | 49% | 51% | 61% | 53% |     |
| 1050        | 77%  | 78% | 75% | 76%  | 75%  | 77%  | 66%  | 89%  | 88%  | 55%  | 53%  | 54%  | 51%  | 52% | 51% | 50% | 47% | 50% | 54% | 64% | 48%  | 48%        | 49%  | 49%  | 48% | 54% | 49% | 58% | 52% | 49% | 52% | 65% | 57% |     |     |
| 1047        | 73%  | 78% | 74% | 73%  | 72%  | 76%  | 67%  | 82%  | 88%  | 56%  | 52%  | 54%  | 50%  | 51% | 50% | 49% | 47% | 47% | 54% | 61% | 48%  | 48%        | 49%  | 49%  | 49% | 52% | 49% | 57% | 53% | 53% | 49% | 59% | 57% |     |     |
| 1055        | 52%  | 56% | 49% | 60%  | 59%  | 54%  | 51%  | 59%  | 55%  | 56%  | 74%  | 65%  | 63%  | 59% | 57% | 54% | 52% | 61% | 51% | 63% | 51%  | 51%        | 52%  | 52%  | 52% | 59% | 63% | 61% | 61% | 47% | 57% | 58% | 56% | 52% | 54% |
| 1051        | 54%  | 57% | 51% | 60%  | 59%  | 56%  | 55%  | 57%  | 53%  | 52%  | 74%  | 68%  | 63%  | 60% | 61% | 60% | 55% | 66% | 52% | 61% | 52%  | 52%        | 54%  | 54%  | 55% | 59% | 54% | 55% | 47% | 55% | 52% | 51% | 48% | 55% |     |
| 1061        | 54%  | 57% | 50% | 57%  | 57%  | 54%  | 54%  | 55%  | 54%  | 54%  | 65%  | 68%  | 60%  | 62% | 56% | 53% | 48% | 59% | 57% | 59% | 49%  | 49%        | 50%  | 50%  | 56% | 59% | 56% | 57% | 47% | 49% | 48% | 46% | 51% | 45% |     |
| 589         | 46%  | 49% | 44% | 54%  | 54%  | 49%  | 49%  | 53%  | 51%  | 50%  | 63%  | 63%  | 60%  | 68% | 67% | 62% | 59% | 64% | 58% | 57% | 57%  | 57%        | 59%  | 59%  | 63% | 65% | 66% | 66% | 58% | 57% | 61% | 54% | 54% | 43% |     |
| 587         | 50%  | 52% | 44% | 54%  | 54%  | 50%  | 52%  | 55%  | 52%  | 51%  | 59%  | 60%  | 62%  | 68% | 62% | 53% | 49% | 58% | 59% | 56% | 52%  | 52%        | 54%  | 54%  | 60% | 56% | 55% | 61% | 52% | 52% | 54% | 46% | 51% | 41% |     |
| 999         | 49%  | 49% | 45% | 51%  | 51%  | 51%  | 48%  | 48%  | 51%  | 50%  | 57%  | 61%  | 56%  | 67% | 62% | 66% | 60% | 60% | 57% | 60% | 54%  | 54%        | 55%  | 55%  | 62% | 62% | 62% | 62% | 54% | 49% | 59% | 55% | 53% | 40% |     |
| 575         | 52%  | 52% | 46% | 51%  | 52%  | 53%  | 46%  | 48%  | 50%  | 49%  | 54%  | 60%  | 53%  | 62% | 53% | 66% | 82% | 74% | 55% | 60% | 64%  | 64%        | 65%  | 65%  | 61% | 62% | 61% | 59% | 57% | 49% | 53% | 59% | 51% | 47% |     |
| 557         | 48%  | 48% | 45% | 47%  | 47%  | 49%  | 44%  | 45%  | 47%  | 47%  | 52%  | 53%  | 48%  | 59% | 49% | 60% | 82% | 67% | 49% | 53% | 54%  | 54%        | 55%  | 56%  | 55% | 58% | 53% | 55% | 58% | 53% | 55% | 47% | 40% |     |     |
| 555         | 51%  | 51% | 44% | 56%  | 58%  | 53%  | 48%  | 51%  | 50%  | 47%  | 61%  | 66%  | 59%  | 64% | 58% | 60% | 74% | 67% | 51% | 58% | 56%  | 56%        | 58%  | 58%  | 61% | 60% | 58% | 56% | 56% | 49% | 52% | 53% | 49% | 46% |     |
| 918         | 53%  | 57% | 53% | 53%  | 53%  | 56%  | 51%  | 51%  | 54%  | 51%  | 52%  | 57%  | 58%  | 59% | 57% | 55% | 49% | 51% | 60% | 60% | 56%  | 56%        | 57%  | 57%  | 60% | 59% | 58% | 58% | 57% | 52% | 51% | 54% | 42% |     |     |
| 1066        | 66%  | 68% | 62% | 67%  | 67%  | 66%  | 62%  | 61%  | 64%  | 61%  | 63%  | 61%  | 59%  | 57% | 56% | 60% | 60% | 55% | 58% | 60% | 62%  | 62%        | 63%  | 63%  | 61% | 71% | 66% | 72% | 58% | 55% | 59% | 55% | 64% | 44% |     |
| 1000 (VMH2) | 48%  | 53% | 46% | 50%  | 50%  | 51%  | 46%  | 45%  | 48%  | 48%  | 51%  | 52%  | 49%  | 57% | 52% | 54% | 64% | 54% | 56% | 56% | 62%  | 100%       | 100% | 99%  | 99% | 82% | 73% | 74% | 67% | 61% | 51% | 54% | 60% | 53% | 48% |
| 477         | 48%  | 53% | 46% | 50%  | 50%  | 51%  | 46%  | 45%  | 48%  | 48%  | 51%  | 52%  | 49%  | 57% | 52% | 54% | 64% | 54% | 56% | 56% | 62%  | 100%       | 99%  | 99%  | 99% | 82% | 73% | 74% | 67% | 61% | 51% | 54% | 60% | 53% | 48% |
| 471         | 49%  | 54% | 48% | 51%  | 51%  | 52%  | 48%  | 46%  | 49%  | 49%  | 52%  | 54%  | 50%  | 59% | 54% | 55% | 65% | 55% | 58% | 57% | 63%  | 99%        | 99%  | 100% | 83% | 74% | 76% | 68% | 63% | 52% | 55% | 61% | 54% | 49% |     |
| 459         | 49%  | 54% | 48% | 51%  | 51%  | 52%  | 48%  | 46%  | 49%  | 49%  | 52%  | 54%  | 50%  | 59% | 54% | 55% | 65% | 55% | 58% | 57% | 63%  | 99%        | 99%  | 100% | 83% | 74% | 76% | 68% | 63% | 52% | 55% | 61% | 54% | 49% |     |
| 476         | 49%  | 54% | 49% | 50%  | 50%  | 52%  | 49%  | 43%  | 48%  | 49%  | 59%  | 55%  | 56%  | 63% | 60% | 62% | 61% | 56% | 61% | 60% | 61%  | 82%        | 82%  | 83%  | 83% | 73% | 76% | 67% | 64% | 53% | 57% | 60% | 51% | 44% |     |
| 468         | 54%  | 57% | 51% | 54%  | 54%  | 54%  | 54%  | 51%  | 54%  | 52%  | 63%  | 59%  | 59%  | 65% | 50% | 62% | 62% | 55% | 60% | 59% | 73%  | 73%        | 73%  | 74%  | 74% | 73% | 76% | 89% | 89% | 89% | 80% | 60% | 58% | 46% |     |
| 458         | 51%  | 52% | 49% | 49%  | 49%  | 49%  | 52%  | 47%  | 49%  | 49%  | 61%  | 54%  | 56%  | 66% | 55% | 62% | 61% | 58% | 58% | 58% | 66%  | 74%        | 74%  | 76%  | 76% | 76% | 89% | 89% | 84% | 64% | 51% | 61% | 61% | 60% | 44% |
| 586         | 56%  | 59% | 54% | 56%  | 56%  | 59%  | 55%  | 58%  | 57%  | 61%  | 55%  | 57%  | 61%  | 62% | 59% | 53% | 56% | 58% | 72% | 67% | 67%  | 67%        | 68%  | 68%  | 67% | 89% | 84% | 67% | 53% | 63% | 59% | 64% | 49% |     |     |
| 920         | 54%  | 55% | 48% | 54%  | 54%  | 54%  | 54%  | 51%  | 52%  | 53%  | 47%  | 47%  | 47%  | 58% | 52% | 54% | 57% | 55% | 56% | 57% | 58%  | 61%        | 61%  | 63%  | 63% | 64% | 65% | 64% | 67% | 55% | 58% | 53% | 50% | 49% |     |
| 921         | 48%  | 52% | 45% | 53%  | 52%  | 49%  | 51%  | 49%  | 52%  | 53%  | 57%  | 52%  | 49%  | 49% | 48% | 49% | 48% | 49% | 52% | 55% | 51%  | 51%        | 52%  | 52%  | 53% | 49% | 51% | 53% | 55% | 55% | 42% | 43% | 49% |     |     |
| 710         | 48%  | 52% | 48% | 54%  | 53%  | 51%  | 48%  | 49%  | 49%  | 49%  | 58%  | 52%  | 48%  | 61% | 54% | 59% | 53% | 49% | 52% | 52% | 59%  | 54%        | 54%  | 55%  | 55% | 57% | 60% | 61% | 63% | 58% | 55% | 57% | 43% | 46% |     |
| 552         | 50%  | 52% | 46% | 52%  | 51%  | 52%  | 44%  | 51%  | 52%  | 49%  | 56%  | 51%  | 46%  | 54% | 46% | 55% | 59% | 55% | 53% | 51% | 55%  | 60%        | 60%  | 61%  | 61% | 60% | 60% | 61% | 59% | 53% | 42% | 57% | 57% | 43% |     |
| 643         | 63%  | 59% | 55% | 60%  | 60%  | 61%  | 59%  | 61%  | 65%  | 59%  | 52%  | 48%  | 51%  | 54% | 51% | 53% | 51% | 47% | 49% | 54% | 64%  | 53%        | 53%  | 54%  | 54% | 51% | 58% | 60% | 64% | 50% | 43% | 54% | 57% | 46% |     |
| 916         | 51%  | 57% | 45% | 52%  | 51%  | 48%  | 48%  | 53%  | 57%  | 57%  | 54%  | 55%  | 45%  | 43% | 41% | 40% | 47% | 40% | 46% | 42% | 44%  | 48%        | 48%  | 49%  | 49% | 44% | 46% | 44% | 49% | 49% | 49% | 46% | 43% | 46% |     |

**Table 2F. Identities region 6 (without N-terminus region preceding first cysteine of the eight-cysteine pattern)**

|            | 990        | 489        | 737        | 988        | 738        | 729 (S...  | 728        | 987        | 974        | 986        | 733        | 629        | 659         | 495         | 493         | 670        | 770         | 763        | 768         | 758        | 716        | 715        | 608        | 581        | 876        | 546        | 661        | 657        | 956        |     |
|------------|------------|------------|------------|------------|------------|------------|------------|------------|------------|------------|------------|------------|-------------|-------------|-------------|------------|-------------|------------|-------------|------------|------------|------------|------------|------------|------------|------------|------------|------------|------------|-----|
| 990        |            |            |            |            |            |            |            |            |            |            |            |            |             |             |             |            |             |            |             |            |            |            |            |            |            |            |            |            |            |     |
| 489        | <b>99%</b> |            | <b>79%</b> | 39%        | 39%        | 38%        | 39%        | 43%        | 39%        | 37%        | 37%        | 39%        | 33%         | 33%         | 33%         | 29%        | 33%         | 33%        | 34%         | 36%        | 36%        | 33%        | 32%        | 32%        | 38%        | 38%        | 37%        | 33%        | 27%        |     |
| 737        | <b>79%</b> | <b>78%</b> |            | <b>40%</b> | <b>39%</b> | <b>39%</b> | <b>39%</b> | <b>40%</b> | <b>39%</b> | <b>43%</b> | <b>41%</b> | <b>38%</b> | <b>35%</b>  | <b>35%</b>  | <b>35%</b>  | <b>35%</b> | <b>33%</b>  | <b>33%</b> | <b>34%</b>  | <b>35%</b> | <b>34%</b> | <b>32%</b> | <b>30%</b> | <b>32%</b> | <b>38%</b> | <b>38%</b> | <b>39%</b> | <b>35%</b> | <b>25%</b> |     |
| 988        | 39%        | 39%        | 40%        |            | <b>81%</b> | 49%        | 51%        | 47%        | 42%        | 51%        | 46%        | 46%        | 36%         | 36%         | 36%         | 38%        | 31%         | 31%        | 32%         | 41%        | 34%        | 33%        | 40%        | 38%        | 39%        | 36%        | 36%        | 42%        | 32%        |     |
| 738        | 39%        | 39%        | 39%        | <b>81%</b> |            | 46%        | 47%        | 43%        | 40%        | 46%        | 44%        | 43%        | 33%         | 33%         | 33%         | 33%        | 32%         | 32%        | 31%         | 39%        | 33%        | 34%        | 41%        | 35%        | 37%        | 35%        | 35%        | 38%        | 30%        |     |
| 729 (SC16) | 38%        | 38%        | 39%        | 49%        | 46%        |            | <b>96%</b> | 41%        | 40%        | 44%        | 41%        | 41%        | 36%         | 36%         | 36%         | 41%        | 30%         | 30%        | 30%         | 38%        | 34%        | 33%        | 34%        | 36%        | 40%        | 33%        | 42%        | 41%        | 27%        |     |
| 728        | 39%        | 39%        | 39%        | 51%        | 47%        | <b>96%</b> |            | 41%        | 40%        | 44%        | 41%        | 43%        | 36%         | 36%         | 36%         | 40%        | 31%         | 31%        | 31%         | 39%        | 33%        | 34%        | 35%        | 36%        | 40%        | 34%        | 41%        | 40%        | 28%        |     |
| 987        | 43%        | 43%        | 40%        | 47%        | 43%        | 41%        | 41%        |            | <b>83%</b> | <b>75%</b> | <b>78%</b> | 51%        | 36%         | 36%         | 36%         | 45%        | 36%         | 36%        | 38%         | 39%        | 40%        | 41%        | 43%        | 41%        | 46%        | 41%        | 36%        | 42%        | 33%        |     |
| 974        | 39%        | 39%        | 39%        | 42%        | 40%        | 40%        | <b>83%</b> |            | <b>74%</b> | <b>78%</b> | 48%        | 33%        | 33%         | 33%         | 36%         | 34%        | 34%         | 35%        | 35%         | 36%        | 36%        | 45%        | 41%        | 43%        | 41%        | 39%        | 45%        | 34%        |            |     |
| 986        | 37%        | 37%        | 43%        | 51%        | 46%        | 44%        | 44%        | <b>75%</b> | <b>74%</b> | <b>83%</b> | 46%        | 37%        | 37%         | 37%         | 40%         | 32%        | 32%         | 33%        | 41%         | 42%        | 37%        | 46%        | 43%        | 41%        | 40%        | 40%        | 45%        | 31%        |            |     |
| 733        | 37%        | 37%        | 41%        | 46%        | 44%        | 41%        | 41%        | <b>78%</b> | <b>78%</b> | <b>83%</b> | 46%        | 39%        | 39%         | 39%         | 40%         | 38%        | 38%         | 39%        | 44%         | 40%        | 36%        | 48%        | 42%        | 42%        | 42%        | 36%        | 40%        | 29%        |            |     |
| 629        | 39%        | 39%        | 38%        | 46%        | 43%        | 41%        | 43%        | 51%        | 48%        | 46%        |            |            |             | 38%         | 38%         | 38%        | 39%         | 34%        | 34%         | 35%        | 40%        | 38%        | 43%        | 45%        | 43%        | 44%        | 43%        | 46%        | 33%        |     |
| 659        | 33%        | 33%        | 35%        | 36%        | 33%        | 36%        | 36%        | 36%        | 33%        | 37%        | 39%        | 38%        |             | <b>100%</b> | <b>100%</b> | 40%        | 28%         | 28%        | 28%         | 42%        | 38%        | 33%        | 41%        | 45%        | 42%        | 34%        | 37%        | 39%        | 26%        |     |
| 495        | 33%        | 33%        | 35%        | 36%        | 33%        | 36%        | 36%        | 36%        | 33%        | 37%        | 39%        | 38%        | <b>100%</b> |             | <b>100%</b> | 40%        | 28%         | 28%        | 28%         | 42%        | 38%        | 33%        | 41%        | 45%        | 42%        | 34%        | 37%        | 39%        | 26%        |     |
| 493        | 33%        | 33%        | 35%        | 36%        | 33%        | 36%        | 36%        | 36%        | 33%        | 37%        | 39%        | 38%        | <b>100%</b> | <b>100%</b> |             | 40%        | 28%         | 28%        | 28%         | 42%        | 38%        | 33%        | 41%        | 45%        | 42%        | 34%        | 37%        | 39%        | 26%        |     |
| 670        | 29%        | 29%        | 35%        | 38%        | 33%        | 41%        | 40%        | 45%        | 36%        | 40%        | 40%        | 39%        | 40%         | 40%         | 40%         |            | 31%         | 31%        | 31%         | 32%        | 33%        | 37%        | 42%        | 39%        | 36%        | 36%        | 36%        | 40%        | 33%        |     |
| 770        | 33%        | 31%        | 33%        | 31%        | 32%        | 30%        | 31%        | 36%        | 34%        | 32%        | 38%        | 34%        | 28%         | 28%         | 28%         | 31%        |             |            | <b>100%</b> | <b>98%</b> | 48%        | 37%        | 37%        | 43%        | 40%        | 36%        | 33%        | 36%        | 34%        | 26% |
| 763        | 33%        | 31%        | 33%        | 31%        | 32%        | 30%        | 31%        | 36%        | 34%        | 32%        | 38%        | 34%        | 28%         | 28%         | 28%         | 31%        | <b>100%</b> |            | <b>98%</b>  | <b>98%</b> | 48%        | 37%        | 37%        | 43%        | 40%        | 36%        | 33%        | 36%        | 34%        | 26% |
| 768        | 34%        | 33%        | 34%        | 32%        | 31%        | 30%        | 31%        | 38%        | 35%        | 33%        | 39%        | 35%        | 28%         | 28%         | 28%         | 31%        | <b>98%</b>  | <b>98%</b> |             | 48%        | 36%        | 36%        | 43%        | 40%        | 36%        | 34%        | 38%        | 35%        | 26%        |     |
| 758        | 36%        | 35%        | 35%        | 41%        | 39%        | 38%        | 39%        | 39%        | 35%        | 41%        | 44%        | 40%        | 42%         | 42%         | 42%         | 32%        | 48%         | 48%        | 48%         |            | 45%        | 45%        | 47%        | 47%        | 41%        | 39%        | 35%        | 38%        | 30%        |     |
| 716        | 36%        | 36%        | 34%        | 34%        | 33%        | 34%        | 33%        | 40%        | 36%        | 42%        | 40%        | 38%        | 38%         | 38%         | 38%         | 33%        | 37%         | 37%        | 36%         | 45%        |            | <b>56%</b> | 47%        | 44%        | 42%        | 38%        | 36%        | 38%        | 31%        |     |
| 715        | 33%        | 33%        | 32%        | 33%        | 34%        | 33%        | 34%        | 41%        | 36%        | 37%        | 36%        | 43%        | 33%         | 33%         | 33%         | 37%        | 37%         | 37%        | 36%         | 45%        | <b>56%</b> |            | 43%        | 38%        | 38%        | 41%        | 33%        | 38%        | 30%        |     |
| 608        | 32%        | 32%        | 30%        | 40%        | 41%        | 34%        | 35%        | 43%        | 45%        | 46%        | 48%        | 45%        | 41%         | 41%         | 41%         | 42%        | 43%         | 43%        | 43%         | 47%        | 47%        | 43%        |            | <b>62%</b> | 42%        | 47%        | 45%        | 48%        | 27%        |     |
| 581        | 32%        | 32%        | 32%        | 38%        | 35%        | 36%        | 36%        | 41%        | 41%        | 43%        | 42%        | 45%        | 45%         | 45%         | 45%         | 39%        | 40%         | 40%        | 40%         | 47%        | 44%        | 38%        | <b>62%</b> |            | 45%        | 45%        | 52%        | 43%        | 33%        |     |
| 876        | 38%        | 38%        | 38%        | 39%        | 37%        | 40%        | 40%        | 46%        | 43%        | 41%        | 42%        | 43%        | 42%         | 42%         | 42%         | 36%        | 36%         | 36%        | 36%         | 41%        | 42%        | 38%        | 42%        | 45%        |            | 48%        | 46%        | 45%        | 36%        |     |
| 546        | 38%        | 37%        | 38%        | 36%        | 35%        | 33%        | 34%        | 41%        | 41%        | 40%        | 42%        | 44%        | 34%         | 34%         | 34%         | 36%        | 33%         | 33%        | 34%         | 39%        | 38%        | 41%        | 47%        | 45%        | <b>48%</b> |            | 47%        | 45%        | 29%        |     |
| 661        | 37%        | 37%        | 39%        | 36%        | 35%        | 42%        | 41%        | 36%        | 39%        | 40%        | 36%        | 43%        | 37%         | 37%         | 37%         | 36%        | 36%         | 36%        | 38%         | 35%        | 36%        | 33%        | 45%        | 52%        | 46%        | 47%        | <b>69%</b> | <b>69%</b> | 36%        |     |
| 657        | 33%        | 33%        | 35%        | 42%        | 38%        | 41%        | 40%        | 42%        | 45%        | 45%        | 40%        | 46%        | 39%         | 39%         | 39%         | 40%        | 34%         | 34%        | 35%         | 38%        | 38%        | 38%        | 48%        | 43%        | 45%        | 45%        | <b>69%</b> | <b>69%</b> | 39%        |     |
| 956        | 27%        | 27%        | 25%        | 32%        | 30%        | 27%        | 28%        | 33%        | 34%        | 31%        | 29%        | 33%        | 26%         | 26%         | 26%         | 33%        | 26%         | 26%        | 26%         | 30%        | 31%        | 30%        | 27%        | 33%        | 36%        | 29%        | 36%        | 39%        |            |     |

**Table 2G. Identities region 7 (without N-terminus region preceding first cysteine of the eight-cysteine pattern)**

|      | 1062 | 1043 | 1004 | 1003 | 841 | 839 | 840 | 837 | 423 | 242 | 998 | 983 | 742 | 709 | 675 | 996 | 975 | 966 | 959 | 908 | 892 | 927 |
|------|------|------|------|------|-----|-----|-----|-----|-----|-----|-----|-----|-----|-----|-----|-----|-----|-----|-----|-----|-----|-----|
| 1062 |      | 58%  | 31%  | 29%  | 26% | 24% | 23% | 23% | 29% | 22% | 21% | 24% | 23% | 32% | 25% | 28% | 33% | 19% | 16% | 23% | 22% | 26% |
| 1043 | 58%  |      | 26%  | 29%  | 24% | 24% | 22% | 22% | 26% | 23% | 23% | 25% | 24% | 27% | 27% | 24% | 25% | 17% | 16% | 24% | 27% | 23% |
| 1004 | 31%  | 26%  |      | 59%  | 25% | 22% | 21% | 27% | 24% | 25% | 23% | 22% | 22% | 23% | 22% | 28% | 27% | 17% | 18% | 20% | 20% | 19% |
| 1003 | 29%  | 29%  | 59%  |      | 24% | 23% | 22% | 34% | 21% | 27% | 20% | 25% | 25% | 23% | 23% | 24% | 27% | 20% | 20% | 22% | 21% | 20% |
| 841  | 26%  | 24%  | 25%  | 24%  |     | 83% | 68% | 54% | 24% | 21% | 22% | 23% | 23% | 29% | 20% | 31% | 27% | 22% | 19% | 19% | 24% | 20% |
| 839  | 24%  | 24%  | 22%  | 23%  | 83% |     | 64% | 53% | 25% | 23% | 22% | 22% | 22% | 25% | 21% | 27% | 25% | 14% | 16% | 16% | 21% | 22% |
| 840  | 23%  | 22%  | 21%  | 22%  | 68% | 64% |     | 48% | 19% | 22% | 16% | 24% | 24% | 29% | 23% | 30% | 24% | 21% | 18% | 18% | 24% | 19% |
| 837  | 23%  | 22%  | 27%  | 34%  | 54% | 53% | 48% |     | 20% | 23% | 21% | 24% | 24% | 27% | 24% | 29% | 26% | 17% | 17% | 16% | 22% | 23% |
| 423  | 29%  | 26%  | 24%  | 21%  | 24% | 25% | 19% | 20% |     | 38% | 34% | 26% | 26% | 27% | 23% | 33% | 27% | 22% | 17% | 26% | 17% | 26% |
| 242  | 22%  | 23%  | 25%  | 27%  | 21% | 23% | 22% | 23% | 38% |     | 28% | 26% | 26% | 23% | 26% | 23% | 22% | 20% | 20% | 16% | 23% | 21% |
| 998  | 21%  | 23%  | 23%  | 20%  | 22% | 22% | 16% | 21% | 34% | 28% |     | 22% | 22% | 27% | 20% | 22% | 25% | 15% | 20% | 24% | 16% | 21% |
| 983  | 24%  | 25%  | 22%  | 25%  | 23% | 22% | 24% | 24% | 26% | 26% | 22% |     | 99% | 34% | 36% | 24% | 25% | 21% | 21% | 28% | 28% | 20% |
| 742  | 23%  | 24%  | 22%  | 25%  | 23% | 22% | 24% | 24% | 26% | 26% | 22% | 99% |     | 33% | 35% | 24% | 25% | 21% | 21% | 28% | 27% | 20% |
| 709  | 32%  | 27%  | 23%  | 23%  | 29% | 25% | 29% | 27% | 27% | 23% | 27% | 34% | 33% |     | 42% | 31% | 32% | 32% | 24% | 29% | 27% | 26% |
| 675  | 25%  | 27%  | 22%  | 23%  | 20% | 21% | 23% | 24% | 23% | 26% | 20% | 36% | 35% | 42% |     | 23% | 26% | 21% | 19% | 25% | 26% | 29% |
| 996  | 28%  | 24%  | 28%  | 24%  | 31% | 27% | 30% | 29% | 33% | 23% | 22% | 24% | 24% | 31% | 23% |     | 39% | 23% | 22% | 29% | 26% | 28% |
| 975  | 33%  | 25%  | 27%  | 27%  | 27% | 25% | 24% | 26% | 27% | 22% | 25% | 25% | 25% | 32% | 26% | 39% |     | 25% | 19% | 25% | 19% | 26% |
| 966  | 19%  | 17%  | 17%  | 20%  | 22% | 14% | 21% | 17% | 22% | 20% | 15% | 21% | 21% | 32% | 21% | 23% | 25% |     | 59% | 29% | 33% | 16% |
| 959  | 16%  | 16%  | 18%  | 20%  | 19% | 16% | 18% | 17% | 17% | 20% | 20% | 21% | 21% | 24% | 19% | 22% | 19% | 59% |     | 27% | 31% | 16% |
| 908  | 23%  | 24%  | 20%  | 22%  | 19% | 16% | 18% | 16% | 26% | 16% | 24% | 28% | 28% | 29% | 25% | 29% | 25% | 29% | 27% |     | 38% | 26% |
| 892  | 22%  | 27%  | 20%  | 21%  | 24% | 21% | 24% | 22% | 17% | 23% | 16% | 28% | 27% | 27% | 26% | 26% | 19% | 33% | 31% | 38% |     | 19% |
| 927  | 26%  | 23%  | 19%  | 20%  | 20% | 22% | 19% | 23% | 26% | 21% | 21% | 20% | 20% | 26% | 29% | 28% | 26% | 16% | 16% | 26% | 19% |     |



**Table 2H. Identities region 8 (without N-terminus region preceding first cysteine of the eight-cysteine pattern)**

|           | 425 | 421 | 260 | 24  | 384 | 178 | 937 | 380 | 193 | 88  | 40  | 226 | 38  | 31  | 37  | 36  | 35  | 329 | 286 | 432 | 219 (E... | 389 | 372 | 429 | 803 | 18 | 321 |  |
|-----------|-----|-----|-----|-----|-----|-----|-----|-----|-----|-----|-----|-----|-----|-----|-----|-----|-----|-----|-----|-----|-----------|-----|-----|-----|-----|----|-----|--|
| 425       |     |     |     |     |     |     |     |     |     |     |     |     |     |     |     |     |     |     |     |     |           |     |     |     |     |    |     |  |
| 421       | 70% |     |     |     |     |     |     |     |     |     |     |     |     |     |     |     |     |     |     |     |           |     |     |     |     |    |     |  |
| 260       | 68% | 61% |     |     |     |     |     |     |     |     |     |     |     |     |     |     |     |     |     |     |           |     |     |     |     |    |     |  |
| 24        | 69% | 63% | 95% |     |     |     |     |     |     |     |     |     |     |     |     |     |     |     |     |     |           |     |     |     |     |    |     |  |
| 384       | 65% | 63% | 92% | 92% |     |     |     |     |     |     |     |     |     |     |     |     |     |     |     |     |           |     |     |     |     |    |     |  |
| 178       | 70% | 64% | 74% | 72% | 73% |     |     |     |     |     |     |     |     |     |     |     |     |     |     |     |           |     |     |     |     |    |     |  |
| 937       | 32% | 36% | 32% | 33% | 34% | 33% |     |     |     |     |     |     |     |     |     |     |     |     |     |     |           |     |     |     |     |    |     |  |
| 380       | 20% | 23% | 23% | 24% | 23% | 21% | 24% |     |     |     |     |     |     |     |     |     |     |     |     |     |           |     |     |     |     |    |     |  |
| 193       | 28% | 28% | 30% | 29% | 31% | 28% | 28% | 34% |     |     |     |     |     |     |     |     |     |     |     |     |           |     |     |     |     |    |     |  |
| 88        | 13% | 14% | 14% | 14% | 13% | 13% | 15% | 28% | 18% |     |     |     |     |     |     |     |     |     |     |     |           |     |     |     |     |    |     |  |
| 40        | 14% | 14% | 15% | 15% | 14% | 14% | 15% | 23% | 26% | 55% |     |     |     |     |     |     |     |     |     |     |           |     |     |     |     |    |     |  |
| 226       | 18% | 17% | 18% | 18% | 16% | 19% | 13% | 23% | 20% | 47% | 45% |     |     |     |     |     |     |     |     |     |           |     |     |     |     |    |     |  |
| 38        | 19% | 14% | 18% | 18% | 18% | 16% | 20% | 20% | 17% | 16% | 12% | 17% |     |     |     |     |     |     |     |     |           |     |     |     |     |    |     |  |
| 31        | 19% | 14% | 18% | 18% | 18% | 16% | 20% | 20% | 17% | 18% | 14% | 18% | 97% |     |     |     |     |     |     |     |           |     |     |     |     |    |     |  |
| 37        | 19% | 14% | 19% | 19% | 19% | 18% | 17% | 18% | 20% | 18% | 14% | 17% | 77% | 80% |     |     |     |     |     |     |           |     |     |     |     |    |     |  |
| 36        | 19% | 14% | 19% | 19% | 19% | 18% | 17% | 18% | 20% | 19% | 14% | 17% | 79% | 81% | 99% |     |     |     |     |     |           |     |     |     |     |    |     |  |
| 35        | 20% | 17% | 19% | 19% | 19% | 18% | 20% | 20% | 17% | 16% | 15% | 15% | 77% | 80% | 73% | 73% |     |     |     |     |           |     |     |     |     |    |     |  |
| 329       | 15% | 18% | 17% | 17% | 17% | 17% | 20% | 13% | 14% | 14% | 15% | 15% | 14% | 14% | 12% | 12% | 14% |     |     |     |           |     |     |     |     |    |     |  |
| 286       | 19% | 19% | 20% | 20% | 20% | 22% | 23% | 18% | 16% | 14% | 14% | 14% | 13% | 13% | 12% | 12% | 13% | 56% |     |     |           |     |     |     |     |    |     |  |
| 432       | 15% | 16% | 15% | 15% | 15% | 16% | 21% | 14% | 13% | 15% | 17% | 18% | 20% | 20% | 19% | 19% | 19% | 45% | 42% |     |           |     |     |     |     |    |     |  |
| 219 (EAS) | 16% | 19% | 20% | 20% | 20% | 20% | 14% | 26% | 25% | 24% | 23% | 23% | 17% | 18% | 20% | 20% | 18% | 14% | 14% | 16% |           |     |     |     |     |    |     |  |
| 389       | 17% | 19% | 18% | 18% | 18% | 16% | 19% | 15% | 14% | 10% | 11% | 13% | 15% | 15% | 14% | 14% | 15% | 28% | 29% | 25% | 17%       |     |     |     |     |    |     |  |
| 372       | 19% | 20% | 19% | 19% | 19% | 19% | 13% | 19% | 16% | 14% | 16% | 12% | 12% | 12% | 14% | 14% | 12% | 27% | 33% | 22% | 19%       | 26% |     |     |     |    |     |  |
| 429       | 10% | 11% | 13% | 12% | 12% | 14% | 15% | 18% | 19% | 17% | 13% | 18% | 24% | 23% | 23% | 23% | 25% | 11% | 12% | 12% | 20%       | 13% | 9%  | 9%  |     |    |     |  |
| 803       | 23% | 22% | 19% | 19% | 20% | 22% | 22% | 18% | 23% | 20% | 16% | 17% | 17% | 18% | 18% | 18% | 18% | 16% | 16% | 14% | 17%       | 16% | 8%  | 17% |     |    |     |  |
| 18        | 16% | 16% | 17% | 17% | 17% | 19% | 19% | 22% | 23% | 27% | 25% | 27% | 21% | 21% | 18% | 17% | 20% | 13% | 14% | 17% | 20%       | 16% | 11% | 19% | 20% |    |     |  |
| 321       | 8%  | 9%  | 11% | 11% | 9%  | 7%  | 11% | 12% | 9%  | 9%  | 8%  | 8%  | 7%  | 7%  | 7%  | 7%  | 6%  | 11% | 8%  | 8%  | 10%       | 12% | 11% | 8%  | 9%  | 7% |     |  |

**Table 2I. Identities region 9 (without N-terminus region preceding first cysteine of the eight-cysteine pattern)**

|            | 866 | 861 | 854 | 853 | 424 | 592 | 358 | 229 | 177 (D... | 165  | 262 | 261 | 21  | 356 | 224 | 377 | 183 (M... | 225 | 973 | 380 | 294 | 330 | 207 | 34  | 427 | 304 |
|------------|-----|-----|-----|-----|-----|-----|-----|-----|-----------|------|-----|-----|-----|-----|-----|-----|-----------|-----|-----|-----|-----|-----|-----|-----|-----|-----|
| 866        |     | 83% | 76% | 39% | 26% | 35% | 18% | 19% | 14%       | 14%  | 11% | 12% | 12% | 16% | 16% | 13% | 17%       | 16% | 25% | 24% | 20% | 16% | 16% | 14% | 12% | 19% |
| 861        | 83% |     | 73% | 39% | 25% | 30% | 16% | 18% | 13%       | 13%  | 11% | 13% | 13% | 16% | 16% | 11% | 15%       | 18% | 25% | 25% | 19% | 19% | 17% | 16% | 13% | 20% |
| 854        | 76% | 73% |     | 39% | 26% | 31% | 18% | 18% | 12%       | 12%  | 11% | 12% | 12% | 17% | 18% | 11% | 17%       | 15% | 25% | 21% | 20% | 19% | 19% | 17% | 15% | 19% |
| 853        | 39% | 39% | 39% |     | 36% | 28% | 16% | 16% | 12%       | 12%  | 12% | 11% | 11% | 13% | 13% | 10% | 13%       | 15% | 32% | 20% | 15% | 17% | 17% | 17% | 13% | 15% |
| 424        | 26% | 25% | 26% | 36% |     | 27% | 15% | 16% | 17%       | 17%  | 14% | 15% | 15% | 15% | 15% | 9%  | 13%       | 12% | 27% | 21% | 16% | 17% | 18% | 14% | 13% | 14% |
| 592        | 35% | 30% | 31% | 28% | 27% |     | 15% | 15% | 18%       | 18%  | 16% | 14% | 14% | 19% | 18% | 10% | 15%       | 15% | 31% | 22% | 19% | 17% | 16% | 15% | 11% | 18% |
| 358        | 18% | 16% | 18% | 16% | 15% | 15% |     | 94% | 94%       | 41%  | 41% | 45% | 31% | 31% | 19% | 19% | 13%       | 16% | 12% | 15% | 13% | 14% | 12% | 10% | 10% | 8%  |
| 229        | 19% | 18% | 18% | 16% | 16% | 15% | 94% |     |           | 43%  | 43% | 47% | 31% | 31% | 19% | 19% | 13%       | 16% | 12% | 15% | 15% | 15% | 12% | 11% | 10% | 9%  |
| 177 (DewA) | 14% | 13% | 12% | 12% | 17% | 18% | 41% | 43% |           | 100% | 60% | 39% | 39% | 22% | 20% | 13% | 15%       | 12% | 13% | 16% | 10% | 17% | 11% | 11% | 13% | 10% |
| 165        | 14% | 13% | 12% | 12% | 17% | 18% | 41% | 43% | 100%      |      | 60% | 39% | 39% | 22% | 20% | 13% | 15%       | 12% | 13% | 16% | 10% | 17% | 11% | 11% | 13% | 10% |
| 262        | 11% | 11% | 11% | 12% | 14% | 16% | 45% | 47% | 60%       | 60%  |     | 49% | 49% | 16% | 16% | 14% | 17%       | 13% | 15% | 13% | 11% | 16% | 14% | 10% | 9%  | 11% |
| 261        | 12% | 13% | 12% | 11% | 15% | 14% | 31% | 31% | 39%       | 39%  | 49% |     | 99% | 16% | 18% | 12% | 15%       | 10% | 11% | 10% | 8%  | 12% | 14% | 9%  | 11% | 9%  |
| 21         | 12% | 13% | 12% | 11% | 15% | 14% | 31% | 31% | 39%       | 39%  | 49% | 99% |     | 16% | 18% | 12% | 15%       | 10% | 11% | 10% | 8%  | 12% | 14% | 9%  | 11% | 9%  |
| 356        | 16% | 16% | 17% | 13% | 15% | 19% | 19% | 19% | 22%       | 22%  | 16% | 16% | 16% |     | 92% | 92% | 12%       | 15% | 13% | 14% | 17% | 18% | 16% | 10% | 14% | 13% |
| 224        | 16% | 16% | 18% | 13% | 15% | 18% | 19% | 19% | 20%       | 20%  | 16% | 18% | 18% | 92% |     |     | 12%       | 15% | 13% | 14% | 15% | 18% | 15% | 11% | 14% | 9%  |
| 377        | 13% | 11% | 11% | 10% | 9%  | 10% | 13% | 13% | 13%       | 13%  | 14% | 12% | 12% | 12% | 12% |     | 69%       | 17% | 8%  | 11% | 12% | 14% | 10% | 10% | 5%  | 8%  |
| 183 (MPG1) | 17% | 15% | 17% | 13% | 13% | 15% | 16% | 16% | 15%       | 15%  | 17% | 15% | 15% | 15% | 15% | 69% |           | 26% | 11% | 16% | 15% | 17% | 13% | 12% | 7%  | 11% |
| 225        | 16% | 18% | 15% | 15% | 12% | 15% | 12% | 12% | 12%       | 13%  | 13% | 10% | 10% | 13% | 13% | 17% | 26%       |     | 14% | 15% | 13% | 13% | 12% | 15% | 15% | 12% |
| 973        | 25% | 25% | 25% | 32% | 27% | 31% | 15% | 15% | 13%       | 13%  | 15% | 11% | 11% | 14% | 14% | 8%  | 11%       | 14% |     | 26% | 22% | 19% | 14% | 15% | 14% | 16% |
| 380        | 24% | 25% | 21% | 20% | 21% | 22% | 13% | 15% | 16%       | 16%  | 13% | 10% | 10% | 17% | 15% | 11% | 16%       | 15% | 26% |     | 18% | 21% | 14% | 17% | 13% | 13% |
| 294        | 20% | 19% | 20% | 15% | 16% | 19% | 14% | 15% | 10%       | 10%  | 11% | 8%  | 8%  | 18% | 18% | 12% | 15%       | 13% | 22% | 18% |     | 13% | 17% | 12% | 12% | 16% |
| 330        | 16% | 19% | 19% | 17% | 17% | 17% | 12% | 12% | 17%       | 17%  | 16% | 12% | 12% | 16% | 15% | 14% | 17%       | 13% | 19% | 21% | 13% |     | 17% | 13% | 11% | 15% |
| 207        | 16% | 17% | 19% | 17% | 18% | 16% | 10% | 11% | 11%       | 11%  | 14% | 14% | 14% | 10% | 11% | 10% | 13%       | 12% | 14% | 14% | 17% | 17% |     | 11% | 11% | 13% |
| 34         | 14% | 16% | 17% | 17% | 14% | 15% | 10% | 10% | 11%       | 11%  | 10% | 9%  | 9%  | 14% | 14% | 10% | 12%       | 15% | 15% | 17% | 12% | 13% | 11% |     | 31% | 19% |
| 427        | 12% | 13% | 15% | 13% | 13% | 11% | 15% | 14% | 13%       | 13%  | 9%  | 11% | 11% | 9%  | 9%  | 5%  | 7%        | 15% | 14% | 13% | 12% | 11% | 11% | 31% |     | 14% |
| 304        | 19% | 20% | 19% | 15% | 14% | 18% | 8%  | 9%  | 10%       | 10%  | 11% | 9%  | 9%  | 13% | 13% | 8%  | 11%       | 12% | 16% | 13% | 16% | 15% | 13% | 19% | 14% |     |

**Table 2J. Identities region 10 (without N-terminus region preceding first cysteine of the eight-cysteine pattern)**

|     | 407        | 155        | 201        | 383        | 23         | 255        | 159        | 160        | 163        | 164        | 162        | 161        | 185        | 175        | 209        | 272        | 71         | 276        |
|-----|------------|------------|------------|------------|------------|------------|------------|------------|------------|------------|------------|------------|------------|------------|------------|------------|------------|------------|
| 407 |            | <b>99%</b> | <b>98%</b> | 32%        | 34%        | 35%        | 35%        | 35%        | 35%        | 35%        | 34%        | 35%        | 38%        | 38%        | 40%        | 37%        | 34%        | 33%        |
| 155 | <b>99%</b> |            | <b>99%</b> | 31%        | 33%        | 35%        | 35%        | 35%        | 35%        | 35%        | 34%        | 35%        | 38%        | 38%        | 40%        | 37%        | 34%        | 33%        |
| 201 | <b>98%</b> | <b>99%</b> |            | 32%        | 34%        | 35%        | 35%        | 35%        | 35%        | 35%        | 34%        | 35%        | 39%        | 39%        | 41%        | 37%        | 34%        | 33%        |
| 383 | 32%        | 31%        | 32%        |            | <b>78%</b> | 35%        | 35%        | 35%        | 34%        | 35%        | 33%        | 34%        | 34%        | 35%        | 37%        | 25%        | 26%        | 27%        |
| 23  | 34%        | 33%        | 34%        | <b>78%</b> |            | 37%        | 37%        | 37%        | 36%        | 36%        | 35%        | 36%        | 35%        | 35%        | 36%        | 27%        | 27%        | 25%        |
| 255 | 35%        | 35%        | 35%        | 35%        | 37%        |            | <b>99%</b> | <b>99%</b> | <b>99%</b> | <b>99%</b> | <b>96%</b> | <b>96%</b> | 53%        | 53%        | 45%        | 33%        | 33%        | 38%        |
| 159 | 35%        | 35%        | 35%        | 35%        | 37%        | <b>99%</b> |            | <b>98%</b> | <b>98%</b> | <b>98%</b> | <b>95%</b> | <b>95%</b> | 52%        | 52%        | 44%        | 33%        | 33%        | 38%        |
| 160 | 35%        | 35%        | 35%        | 35%        | 37%        | <b>99%</b> | <b>98%</b> |            | <b>98%</b> | <b>98%</b> | <b>95%</b> | <b>95%</b> | 52%        | 52%        | 45%        | 33%        | 33%        | 38%        |
| 163 | 35%        | 35%        | 35%        | 34%        | 36%        | <b>99%</b> | <b>98%</b> | <b>98%</b> |            | <b>98%</b> | <b>95%</b> | <b>95%</b> | 53%        | 53%        | 45%        | 33%        | 33%        | 38%        |
| 164 | 35%        | 35%        | 35%        | 35%        | 36%        | <b>99%</b> | <b>98%</b> | <b>98%</b> | <b>98%</b> |            | <b>95%</b> | <b>95%</b> | 52%        | 52%        | 46%        | 34%        | 34%        | 39%        |
| 162 | 34%        | 34%        | 34%        | 33%        | 35%        | <b>96%</b> | <b>95%</b> | <b>95%</b> | <b>95%</b> | <b>95%</b> |            | <b>91%</b> | 51%        | 51%        | 44%        | 33%        | 33%        | 39%        |
| 161 | 35%        | 35%        | 35%        | 34%        | 36%        | <b>96%</b> | <b>95%</b> | <b>95%</b> | <b>95%</b> | <b>95%</b> | <b>91%</b> |            | 53%        | 53%        | 46%        | 33%        | 33%        | 38%        |
| 185 | 38%        | 38%        | 39%        | 34%        | 35%        | 53%        | 52%        | 52%        | 53%        | 52%        | 51%        | 53%        |            | <b>99%</b> | <b>99%</b> | 66%        | 34%        | 34%        |
| 175 | 38%        | 38%        | 39%        | 35%        | 35%        | 53%        | 52%        | 52%        | 53%        | 52%        | 51%        | 53%        | <b>99%</b> |            | <b>66%</b> | 34%        | 34%        | 34%        |
| 209 | 40%        | 40%        | 41%        | 37%        | 36%        | 45%        | 44%        | 45%        | 45%        | 46%        | 44%        | 46%        | 66%        | 66%        |            | 33%        | 33%        | 34%        |
| 272 | 37%        | 37%        | 37%        | 25%        | 27%        | 33%        | 33%        | 33%        | 33%        | 34%        | 33%        | 33%        | 34%        | 34%        | 33%        |            | <b>91%</b> | <b>91%</b> |
| 71  | 34%        | 34%        | 34%        | 26%        | 27%        | 33%        | 33%        | 33%        | 33%        | 34%        | 33%        | 33%        | 34%        | 34%        | 33%        | <b>91%</b> |            | <b>76%</b> |
| 276 | 33%        | 33%        | 33%        | 27%        | 25%        | 38%        | 38%        | 38%        | 38%        | 39%        | 39%        | 38%        | 34%        | 34%        | 34%        | 76%        | 76%        |            |

T

**Table 2K. Identities region 11 (without N-terminus region preceding first cysteine of the eight-cysteine pattern)**

|     | 241        | 240        | 379        | 266        | 343 | 361        | 230        | 213 | 217 | 191 | 194 | 180 | 422 |
|-----|------------|------------|------------|------------|-----|------------|------------|-----|-----|-----|-----|-----|-----|
| 241 |            | <b>82%</b> | 41%        | 42%        | 44% | 48%        | 44%        | 41% | 39% | 37% | 40% | 43% | 47% |
| 240 | <b>82%</b> |            | 44%        | 42%        | 43% | 50%        | 48%        | 46% | 42% | 39% | 40% | 51% | 49% |
| 379 | 41%        | 44%        |            | <b>96%</b> | 50% | 52%        | 54%        | 46% | 44% | 48% | 44% | 49% | 47% |
| 266 | 42%        | 42%        | <b>96%</b> |            | 50% | 50%        | 51%        | 45% | 45% | 46% | 43% | 50% | 47% |
| 343 | 44%        | 43%        | 50%        | 50%        |     | 52%        | 54%        | 42% | 39% | 44% | 39% | 45% | 50% |
| 361 | 48%        | 50%        | 52%        | 50%        | 52% |            | <b>87%</b> | 50% | 48% | 49% | 49% | 49% | 52% |
| 230 | 44%        | 48%        | 54%        | 51%        | 54% | <b>87%</b> |            | 54% | 46% | 50% | 49% | 51% | 55% |
| 213 | 41%        | 46%        | 46%        | 45%        | 42% | 50%        | 54%        |     | 46% | 43% | 38% | 49% | 46% |
| 217 | 39%        | 42%        | 44%        | 45%        | 39% | 48%        | 46%        | 46% |     | 55% | 56% | 54% | 55% |
| 191 | 37%        | 39%        | 48%        | 46%        | 44% | 49%        | 50%        | 43% | 55% |     | 51% | 45% | 46% |
| 194 | 40%        | 40%        | 44%        | 43%        | 39% | 49%        | 49%        | 38% | 56% | 51% |     | 52% | 51% |
| 180 | 43%        | 51%        | 49%        | 50%        | 45% | 49%        | 51%        | 49% | 54% | 45% | 52% |     | 56% |
| 422 | 47%        | 49%        | 47%        | 47%        | 50% | 52%        | 55%        | 46% | 55% | 46% | 51% | 56% |     |

**Table 2L. Identities region 12 (without N-terminus region preceding first cysteine of the eight-cysteine pattern)**

|            | 26         | 19         | 385        | 25  | 265        | 20         | 346        | 323        | 189 (RodA) | 248        | 195        | 216 | 176 |
|------------|------------|------------|------------|-----|------------|------------|------------|------------|------------|------------|------------|-----|-----|
| 26         |            | <b>99%</b> | <b>97%</b> | 87% | 90%        | 89%        | <b>90%</b> | 79%        | 81%        | 82%        | 79%        | 82% | 75% |
| 19         | <b>99%</b> |            | <b>98%</b> | 86% | <b>90%</b> | 90%        | <b>91%</b> | 80%        | 82%        | 83%        | 80%        | 83% | 76% |
| 385        | <b>97%</b> | <b>98%</b> |            | 88% | 89%        | 88%        | 90%        | 80%        | 82%        | 83%        | 80%        | 83% | 75% |
| 25         | 87%        | 86%        | 88%        |     | 81%        | 80%        | 80%        | 74%        | 76%        | 77%        | 77%        | 78% | 72% |
| 265        | 90%        | 90%        | 89%        | 81% |            | <b>99%</b> | <b>90%</b> | 80%        | 82%        | 84%        | 82%        | 80% | 79% |
| 20         | 89%        | 90%        | 88%        | 80% | <b>99%</b> |            | <b>91%</b> | 80%        | 82%        | 84%        | 82%        | 80% | 80% |
| 346        | 90%        | 91%        | 90%        | 80% | 90%        | 91%        |            | 82%        | 84%        | 86%        | 83%        | 82% | 79% |
| 323        | 79%        | 80%        | 80%        | 74% | 80%        | 80%        | 82%        |            | <b>98%</b> | <b>96%</b> | <b>92%</b> | 86% | 74% |
| 189 (RodA) | 81%        | 82%        | 82%        | 76% | 82%        | 82%        | 84%        | <b>98%</b> |            | <b>98%</b> | <b>94%</b> | 88% | 76% |
| 248        | 82%        | 83%        | 83%        | 77% | 84%        | 84%        | 86%        | <b>96%</b> | <b>98%</b> |            | <b>96%</b> | 89% | 77% |
| 195        | 79%        | 80%        | 80%        | 77% | 82%        | 82%        | 83%        | <b>92%</b> | <b>94%</b> | <b>96%</b> |            | 87% | 76% |
| 216        | 82%        | 83%        | 83%        | 78% | 80%        | 80%        | 82%        | 86%        | 88%        | 89%        | 87%        |     | 72% |
| 176        | 75%        | 76%        | 75%        | 72% | 79%        | 80%        | 79%        | 74%        | 76%        | 77%        | 76%        | 72% |     |
